# Supplementary material for: δ and φ back-donation in AnIV metallacycles
Source: PubMed Central journal article supplement (PMC7096508; doi:10.1038/s41467-020-15197-w), 2020-03-25
Supplement: 41467_2020_15197_MOESM1_ESM.pdf [file 41467_2020_15197_MOESM1_ESM.pdf]

## Supplementary Information

### $\delta$ and $\varphi$ Back-Donation in An<sup>IV</sup> Metallacycles

Morgan P. Kelley,<sup>‡</sup> Ivan A. Popov,<sup>‡</sup> Julie Jung, Enrique R. Batista\* & Ping Yang\*

<sup>‡</sup>These authors contributed equally.

Theoretical Division, Los Alamos National Laboratory, Los Alamos, New Mexico, USA, 87545.

[erb@lanl.gov](mailto:erb@lanl.gov), [pyang@lanl.gov](mailto:pyang@lanl.gov)

| Table of Contents                                                                                                                                                                | Pg      | Id                    |
|----------------------------------------------------------------------------------------------------------------------------------------------------------------------------------|---------|-----------------------|
| Structural properties of the propene complexes                                                                                                                                   | S3      | ST1                   |
| Structural properties of the cumulene complexes                                                                                                                                  | S4      | ST2                   |
| Crystal structure references                                                                                                                                                     | S5      |                       |
| Values of the L–M $\sigma$ and $\pi$ donations and M–L $\delta$ or $\varphi$ back-donation in propenes and cumulenes                                                             | S5      | ST3                   |
| $C_2(SiMe_3)_2$ -to-M $\pi$ electron donation in actinide propenes and Group 4 propenes                                                                                          | S5      | ST4                   |
| Effect of the substitution of the trimethylsilyl groups by H atoms                                                                                                               | S5      | ST5                   |
| ON values of the selected bonds of the U-cumulene complex and its H-substituted analogs                                                                                          | S6      | ST6                   |
| Evolution of the energy gap (in a.u.) between the singly occupied $\delta$ orbital and corresponding unoccupied ligand orbital as a function of the An in propenes and cumulenes | S6      | ST7                   |
| ON values of the 1c-1e, 5c-1e AdNDP bonds and $\delta/\varphi$ back-donation at ECP60MWB_ANO and ECP60MWB_SEG basis sets                                                         | S6      | ST8                   |
| Calculated IR spectra for $(C_5Me_5)_2Th(\eta^4-1,2,3,4-PhC_4Ph)$ and $(C_5Me_5)_2U(\eta^4-1,2,3,4-PhC_4Ph)$                                                                     | S6      | SF1                   |
| Calculated molecular orbitals for the $(\eta^5-C_5Me_5)_2U[\eta^4-C_2(SiMe_3)_2]$ complexes (An = Th-Pu)                                                                         | S7      | SF2                   |
| Calculated molecular orbitals for the $(\eta^5-C_5Me_5)_2U[\eta^4-C_4(SiMe_3)_2]$ complexes (An = Th-Pu)                                                                         | S7      | SF3                   |
| AdNDP $\sigma$ bonds found in propenes                                                                                                                                           | S8      | SF4                   |
| NPA charges on the M centers in the propene series                                                                                                                               | S8      | SF5                   |
| Composition of the M hybrids in the M–C $2c-2e$ $\sigma$ bonds in the propene series                                                                                             | S9      | SF6                   |
| Composition of the C hybrids in the M–C $2c-2e$ $\sigma$ bonds in the propene series                                                                                             | S9      | SF7                   |
| ON values (in  e ) of the M–C $\sigma$ and M–C–C $\pi$ bonds in the propene series                                                                                               | S9      | SF8                   |
| Involvement of the M center in the $\pi$ and $\delta$ bonding with the $C_2(SiMe_3)_2$ ligand for Pa propene                                                                     | S10     | SF9                   |
| Unpaired $f$ -electrons on the M centers in the propene series                                                                                                                   | S11     | SF10                  |
| Three $6c-2e$ $\pi$ bonds forming $\pi$ aromatic set over each $C_p$ ring in the propene series                                                                                  | S12     | SF11                  |
| Canonical molecular orbitals for the $(\eta^5-C_5Me_5)_2U[\eta^4-C_4(SiMe_3)_2]$ complex                                                                                         | S13     | SF12                  |
| AdNDP $\sigma$ bonds found in cumulenes                                                                                                                                          | S14     | SF13                  |
| AdNDP bonding elements found between the $C_4(SiMe_3)_2$ ligand and the M center in the cumulene series                                                                          | S15     | SF14                  |
| NPA charges on the M centers in the cumulene series                                                                                                                              | S16     | SF15                  |
| Composition of the M hybrids in the M–C $_{\alpha}$ $2c-2e$ $\sigma$ bonds in the cumulene series                                                                                | S17     | SF16                  |
| Composition of the C $_{\alpha}$ hybrids in the M–C $_{\alpha}$ $2c-2e$ $\sigma$ bonds in the cumulene series                                                                    | S17     | SF17                  |
| ON values (in  e ) of the M–C $_{\alpha}$ $\sigma$ bonds and M–C–C $\pi$ bonds in the cumulene series                                                                            | S17     | SF18                  |
| Involvement of the M center in the $\pi$ bonding with the $C_4(SiMe_3)_2$ ligand in the cumulene series                                                                          | S19     | SF19                  |
| Unpaired $f$ -electrons on the M centers in the cumulene series                                                                                                                  | S21     | SF20                  |
| Involvement of the M center in the $\varphi$ bonding with the $C_4(SiMe_3)_2$ ligand in the cumulene series                                                                      | S22     | SF21                  |
| Calculated UV-Visible-NIR electron absorption spectra for $(C_5Me_5)_2An(\eta^4-1,2,3,4-PhC_4Ph)$ (An = Pa-Pu), UV-Vis region                                                    | S23     | SF22                  |
| Calculated UV-Visible-NIR electron absorption spectra for $(C_5Me_5)_2An(\eta^4-1,2,3,4-PhC_4Ph)$ (An = Pa-Pu), near-IR region                                                   | S23     | SF23                  |
| Molecular orbital energy levels in the $(\eta^5-C_5Me_5)_2An[\eta^4-C_2(SiMe_3)_2]$ complex using spin-orbit coupling and scalar methods, (An=Th-Pu)                             | S24-S26 | SF24-SF28             |
| Magnitude of the direct L–M $\sigma$ and $\pi$ donation and M–L $\delta$ or $\varphi$ back-donation at PBE0                                                                      | S27     | SF29                  |
| CASSCF calculations on metallacyclocumulenes                                                                                                                                     | S28-S34 | SF30-SF35<br>ST9-ST13 |
| Supplementary References                                                                                                                                                         | S35     |                       |

**Supplementary Table 1.** Structural properties of the propene complexes; C<sub>p</sub> groups other than C<sub>5</sub>Me<sub>5</sub> are specified where appropriate.

| R              | M <sup>4+</sup> | Source                                                                           | Distances |          |       | Angles  |         |
|----------------|-----------------|----------------------------------------------------------------------------------|-----------|----------|-------|---------|---------|
|                |                 |                                                                                  | M-Cp      | M-C      | C - C | Cp-M-Cp | C- M- C |
| trimethylsilyl | Ti              | This work                                                                        | 2.146(3)  | 2.122(1) | 1.327 | 138.3   | 36.4    |
|                |                 | Crystal Structure <sup>5</sup>                                                   | 2.114(6)  | 2.124(3) | 1.309 | 138.6   | 35.9    |
|                | Zr              | This work                                                                        | 2.281(1)  | 2.241(1) | 1.338 | 139.5   | 34.8    |
|                | Th              | This work                                                                        | 2.567(0)  | 2.396(1) | 1.36  | 140.3   | 33      |
|                | Pa              | This work                                                                        | 2.516(4)  | 2.262(1) | 1.387 | 139.6   | 35.7    |
|                | U               | This work                                                                        | 2.48(1)   | 2.291(3) | 1.362 | 135.8   | 34.6    |
|                |                 | Crystal Structure <sup>7</sup>                                                   | 2.453(5)  | 2.33(2)  | 1.355 | 138.9   | 33.3    |
|                | Np              | This work                                                                        | 2.476(2)  | 2.322(1) | 1.339 | 137.5   | 33.5    |
|                | Pu              | This work                                                                        | 2.477(1)  | 2.341(1) | 1.334 | 136.3   | 33.1    |
| phenyl         | Ti              | This work                                                                        | 2.1375(5) | 2.094(0) | 1.325 | 141     | 36.9    |
|                |                 | Crystal Structure <sup>8</sup>                                                   | 2.109(1)  | 2.101(3) | 1.307 | 140.7   | 36.2    |
|                | Zr              | This work                                                                        | 2.275(0)  | 2.220(1) | 1.338 | 141.7   | 35.1    |
|                | Th              | This work                                                                        | 2.559(0)  | 2.383(0) | 1.362 | 143.3   | 33.2    |
|                |                 | Crystal Structure <sup>6</sup><br>C <sub>5</sub> ( <i>t</i> -butyl) <sub>2</sub> | 2.592(1)  | 2.395(1) | 1.351 | 138.7   | 32.6    |
|                | Pa              | This work                                                                        | 2.495(1)  | 2.272(1) | 1.382 | 147.7   | 35.4    |
|                | U               | This work                                                                        | 2.463(6)  | 2.284(3) | 1.369 | 147.2   | 34.9    |
|                | Np              | This work                                                                        | 2.460(3)  | 2.289(1) | 1.358 | 144.1   | 34.5    |
|                | Pu              | This work                                                                        | 2.4615(5) | 2.301(1) | 1.350 | 139.9   | 34.1    |

**Supplementary Table 2.** Structural properties of the cumulene complexes; C<sub>p</sub> groups other than C<sub>5</sub>Me<sub>5</sub> are specified where appropriate.

| R              | M <sup>4+</sup> | Source                                                                           | Distances        |                  |                  |                                 |                                 | Angles  |                                    |                                                  |
|----------------|-----------------|----------------------------------------------------------------------------------|------------------|------------------|------------------|---------------------------------|---------------------------------|---------|------------------------------------|--------------------------------------------------|
|                |                 |                                                                                  | M-C <sub>p</sub> | M-C <sub>α</sub> | M-C <sub>β</sub> | C <sub>α</sub> - C <sub>β</sub> | C <sub>β</sub> - C <sub>β</sub> | Cp-M-Cp | C <sub>α</sub> - M- C <sub>α</sub> | C <sub>α</sub> - C <sub>β</sub> - C <sub>β</sub> |
| trimethylsilyl | Ti              | This work                                                                        | 2.164(0)         | 2.393(3)         | 2.223(1)         | 1.294(1)                        | 1.322                           | 136.1   | 99.2                               | 153.8(0)                                         |
|                | Zr              | This work                                                                        | 2.294(6)         | 2.444(4)         | 2.323(1)         | 1.305(0)                        | 1.321                           | 135.6   | 96.3                               | 152.8(1)                                         |
|                | Th              | This work                                                                        | 2.578(4)         | 2.586(2)         | 2.520(1)         | 1.317(0)                        | 1.320                           | 133.9   | 90.1                               | 152.7(1)                                         |
|                |                 | Crystal Structure <sup>1</sup>                                                   | 2.452(3)         | 2.57(1)          | 2.505(4)         | 1.314(0)                        | 1.320                           | 135     | 90.2                               | 153.15(7)                                        |
|                | Pa              | This work                                                                        | 2.53(2)          | 2.456(0)         | 2.413(1)         | 1.331(0)                        | 1.312                           | 132.3   | 95.0                               | 150.1(0)                                         |
|                | U               | This work                                                                        | 2.497(2)         | 2.480(1)         | 2.437(0)         | 1.318(1)                        | 1.318                           | 132.8   | 93.5                               | 150.6(1)                                         |
|                |                 | Crystal Structure <sup>2</sup>                                                   | 2.461(6)         | 2.462(6)         | 2.439(6)         | 1.308(3)                        | 1.314                           | 138.1   | 92.9                               | 148.1(2)                                         |
|                | Np              | This work                                                                        | 2.486(0)         | 2.502(1)         | 2.428(1)         | 1.311(0)                        | 1.319                           | 132     | 93.1                               | 152.0(0)                                         |
|                | Pu              | This work                                                                        | 2.507(8)         | 2.526(4)         | 2.432(3)         | 1.304(1)                        | 1.322                           | 127.7   | 92.4                               | 153.0(0)                                         |
| phenyl         | Ti              | This work                                                                        | 2.180(5)         | 2.26(3)          | 2.228(0)         | 1.306(0)                        | 1.311                           | 137.2   | 104.1                              | 148.6(1)                                         |
|                | Zr              | This work                                                                        | 2.297(2)         | 2.374(2)         | 2.339(1)         | 1.316(0)                        | 1.311                           | 137.7   | 97.4                               | 149.0(1)                                         |
|                |                 | Crystal Structure <sup>3</sup>                                                   | 2.278(3)         | 2.35(1)          | 2.33(1)          | 1.300(5)                        | 1.327                           | 137.3   | 97.6                               | 148.3(4)                                         |
|                | Th              | This work                                                                        | 2.573(5)         | 2.552(1)         | 2.547(1)         | 1.327(0)                        | 1.311                           | 136.8   | 90.2                               | 150.2(0)                                         |
|                |                 | Crystal Structure <sup>4</sup><br>C <sub>5</sub> ( <i>t</i> -butyl) <sub>2</sub> | 2.532(5)         | 2.536(6)         | 2.542(2)         | 1.323(0)                        | 1.310                           | 137.8   | 90.3                               | 150.3(0)                                         |
|                | Pa              | This work                                                                        | 2.52(1)          | 2.423(3)         | 2.439(0)         | 1.340(1)                        | 1.304                           | 137.0   | 95.0                               | 147.9(2)                                         |
|                | U               | This work                                                                        | 2.489(7)         | 2.444(2)         | 2.457(1)         | 1.330(2)                        | 1.308                           | 136.2   | 93.8                               | 148.3(2)                                         |
|                |                 | Crystal Structure <sup>2</sup>                                                   | 2.46(6)          | 2.462(6)         | 2.439(6)         | 1.308(3)                        | 1.314                           | 138.1   | 92.9                               | 148.1(2)                                         |
|                | Np              | This work                                                                        | 2.486(6)         | 2.460(4)         | 2.443(0)         | 1.324(0)                        | 1.309                           | 133.6   | 93.7                               | 149.6(2)                                         |
|                | Pu              | This work                                                                        | 2.480(2)         | 2.507(2)         | 2.467(1)         | 1.312(0)                        | 1.313                           | 136.4   | 92.0                               | 151.0(2)                                         |

**Supplementary Table 3.** Values of the L–M  $\sigma$  and  $\pi$  donations and M–L  $\delta$  or  $\varphi$  back-donation in propenes and cumulenes at PBE and PBE0 level of theory.

| Propenes |          |       |          |          |       |          | Cumulenes |       |           |          |       |           |
|----------|----------|-------|----------|----------|-------|----------|-----------|-------|-----------|----------|-------|-----------|
| Method   | PBE      |       |          | PBE0     |       |          | PBE       |       |           | PBE0     |       |           |
| Type     | $\sigma$ | $\pi$ | $\delta$ | $\sigma$ | $\pi$ | $\delta$ | $\sigma$  | $\pi$ | $\varphi$ | $\sigma$ | $\pi$ | $\varphi$ |
| Th       | 0.369    | 0.138 | N/A      | 0.355    | 0.133 | N/A      | 0.432     | 0.368 | N/A       | 0.432    | 0.353 | N/A       |
| Pa       | 0.429    | 0.238 | 0.140    | 0.391    | 0.212 | 0.071    | 0.536     | 0.565 | 0.270     | 0.519    | 0.499 | 0.091     |
| U        | 0.483    | 0.216 | 0.038    | 0.456    | 0.196 | 0.009    | 0.540     | 0.576 | 0.076     | 0.536    | 0.507 | 0.013     |
| Np       | 0.469    | 0.186 | 0.022    | 0.437    | 0.157 | 0.007    | 0.471     | 0.574 | 0.022     | 0.481    | 0.520 | 0.003     |
| Pu       | 0.440    | 0.167 | 0.014    | 0.409    | 0.128 | 0.005    | 0.403     | 0.547 | 0.016     | 0.395    | 0.504 | 0.002     |

**Supplementary Table 4.**  $C_2(SiMe_3)_2$ -to-M  $\pi$  electron donation (in |e|) in actinide propenes and Group 4 propenes at PBE.

| Th   | Pa   | U    | Np   | Pu   | Ti   | Zr   |
|------|------|------|------|------|------|------|
| 0.14 | 0.24 | 0.22 | 0.19 | 0.17 | 0.07 | 0.09 |

**Supplementary Table 5.** Effect of the substitution of the trimethylsilyl groups by H atoms on the M–C bond distances in the cumulene series.

| An | Original complexes  |                    | H-substituted complexes |                    |
|----|---------------------|--------------------|-------------------------|--------------------|
|    | M–C $_{\alpha}$ , Å | M–C $_{\beta}$ , Å | M–C $_{\alpha}$ , Å     | M–C $_{\beta}$ , Å |
| Th | 2.586               | 2.520              | 2.519                   | 2.539              |
| Pa | 2.456               | 2.412              | 2.396                   | 2.445              |
| U  | 2.480               | 2.437              | 2.418                   | 2.460              |
| Np | 2.502               | 2.428              | 2.426                   | 2.449              |
| Pu | 2.523               | 2.432              | 2.437                   | 2.452              |

**Supplementary Table 6.** The occupation number (ON) values (in |e|) of the selected bonds of the U-cumulene complex (A) and its H-substituted analogs before (B) and after (C) the geometry optimization.

| Bonds                                                                                             | A          | B          | C          |
|---------------------------------------------------------------------------------------------------|------------|------------|------------|
| 2c–2e C $_{\alpha}$ –C $_{\beta}$ $\pi$ bonds // 3c–2e U–C $_{\alpha}$ –C $_{\beta}$ $\pi$ bonds  | 1.69//1.87 | 1.73//1.89 | 1.72//1.89 |
| 2c–2e C $_{\beta}$ –C $_{\beta}$ $\pi$ bonds // 3c–2e U–C $_{\beta}$ –C $_{\beta}$ $\sigma$ bonds | 1.68//1.87 | 1.69//1.91 | 1.69//1.90 |
| 2c–2e M–C $_{\alpha}$ $\sigma$ bonds // 3c–2e U–C $_{\alpha}$ –C $_{\beta}$ $\sigma$ bonds        | 1.68//1.95 | 1.77//1.97 | 1.77//1.97 |
| Unpaired f-electron // 5c–1e $\varphi$ bond                                                       | 0.90//0.97 | 0.92//0.98 | 0.91//0.98 |
| C $_{\alpha}$ –Si (C $_{\alpha}$ –H) $\sigma$ bonds                                               | 1.94       | 1.97       | 1.96       |

**Supplementary Table 7.** Evolution of the energy gap (in a.u.) between the singly occupied  $\delta/\phi$  orbital and corresponding unoccupied ligand orbital as a function of the An in propenes and cumulenes.

| An | Propenes | Cumulenes |
|----|----------|-----------|
| Th | -        | -         |
| Pa | 0.0683   | 0.0399    |
| U  | 0.0809   | 0.0511    |
| Np | 0.0908   | 0.0709    |
| Pu | 0.1022   | 0.0725    |

**Supplementary Table 8.** ON values of the 1c-1e, 5c-1e AdNDP bonds and  $\delta/\phi$  back-donation in the Pa-propene and Pa-cumulene complexes at ECP60MWB\_ANO and ECP60MWB\_SEG basis sets.

| Complex      | Pa-propene |        |                  | Pa-cumulene |        |                |
|--------------|------------|--------|------------------|-------------|--------|----------------|
|              | 1c-1e      | 5c-1e  | $\delta$ bonding | 1c-1e       | 5c-1e  | $\phi$ bonding |
| ECP60MWB_ANO | 0.7886     | 0.9281 | 0.1395           | 0.6750      | 0.9446 | 0.2697         |
| ECP60MWB_SEG | 0.7890     | 0.9280 | 0.1390           | 0.6765      | 0.9445 | 0.2680         |

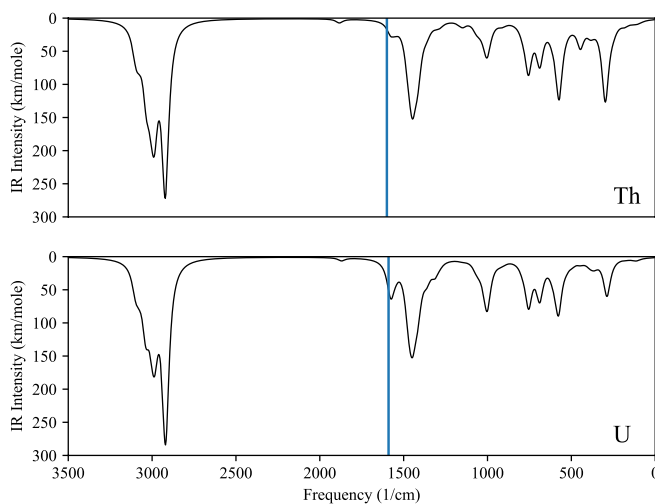

**Supplementary Figure 1.** Calculated IR spectra for  $(C_5Me_5)_2Th(\eta^4-1,2,3,4-PhC_4Ph)$  and  $(C_5Me_5)_2U(\eta^4-1,2,3,4-PhC_4Ph)$ . The vertical blue line shows the  $C_\alpha-C_\beta$  stretch reported by Pagano et al.<sup>2</sup> for comparison.

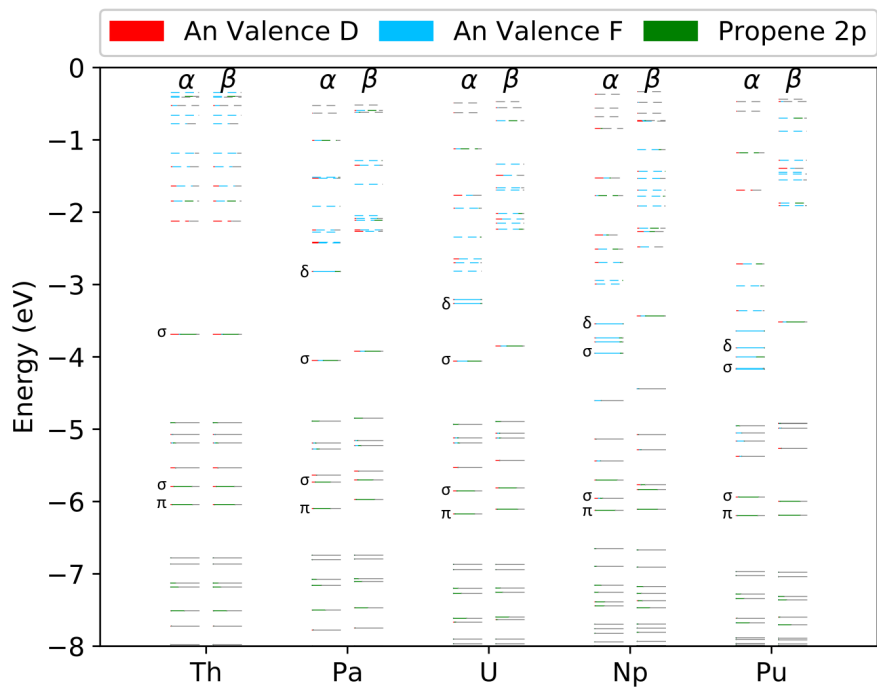

**Supplementary Figure 2.** Calculated molecular orbitals for the  $(\eta^5\text{-C}_5\text{Me}_5)_2\text{U}[\eta^4\text{-C}_2(\text{SiMe}_3)_2]$  complexes (An = Th, Pa, U, Np, Pu) with An bonding orbitals labelled.

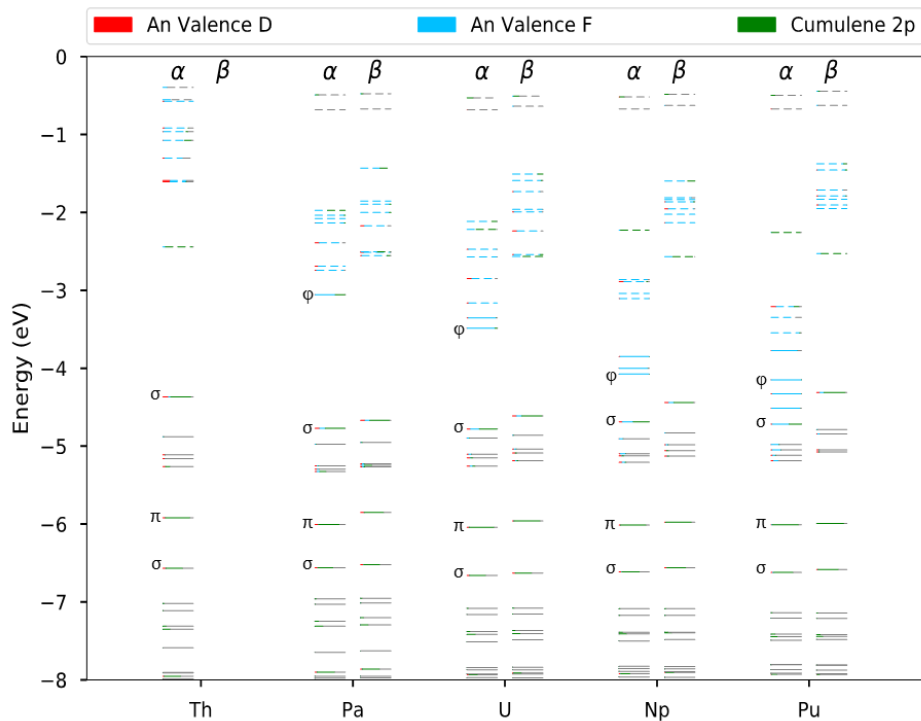

**Supplementary Figure 3.** Calculated molecular orbitals for the  $(\eta^5\text{-C}_5\text{Me}_5)_2\text{U}[\eta^4\text{-C}_4(\text{SiMe}_3)_2]$  complexes (An = Th, Pa, U, Np, Pu) with An bonding orbitals labelled.

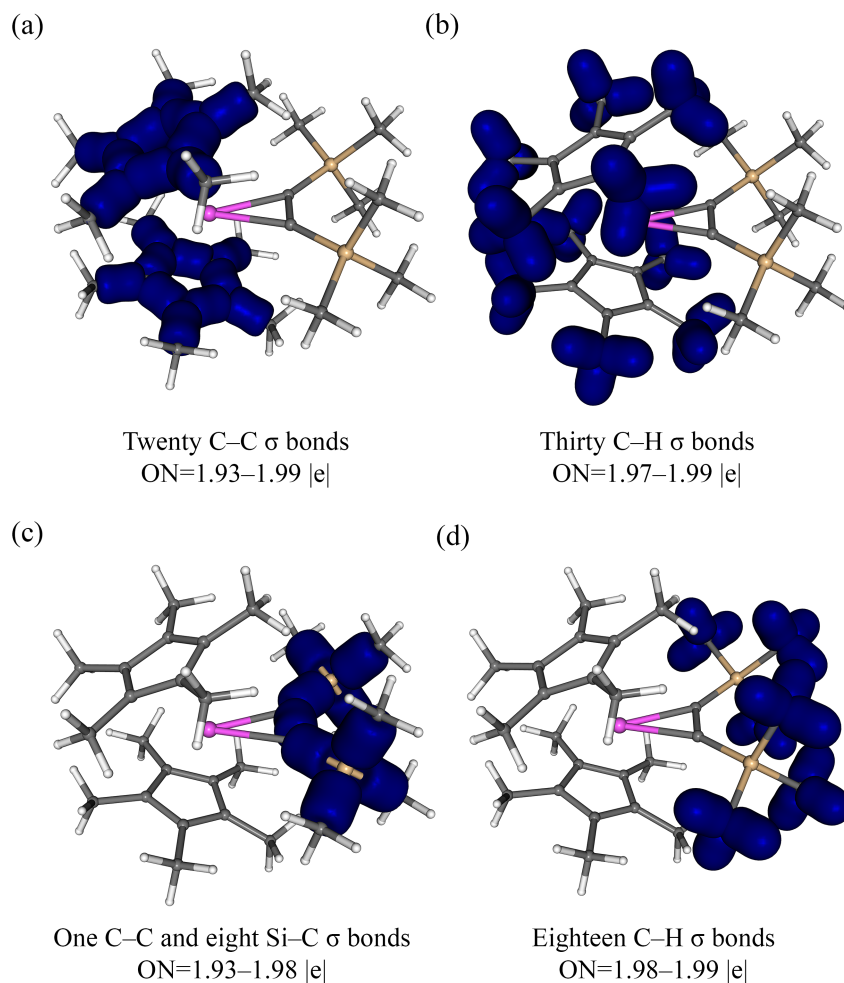

**Supplementary Figure 4.** AdNDP  $\sigma$  bonds found over the (a, b)  $(C_5Me_5)_2$  fragments and (c, d) the  $C_2(SiMe_3)_2$  fragments: (a) Five C–C  $\sigma$  bonds found within each  $C_p$  ring, five C–C  $\sigma$  bonds connecting the  $C_p$  ring and the methyl groups; (b) Thirty C–H  $\sigma$  bonds of the methyl groups connected to  $C_p$  rings; (c) One C–C and eight Si–C  $\sigma$  bonds; (d) Eighteen C–H  $\sigma$  bonds. All the bonds are shown as superimposed onto the single molecular framework.

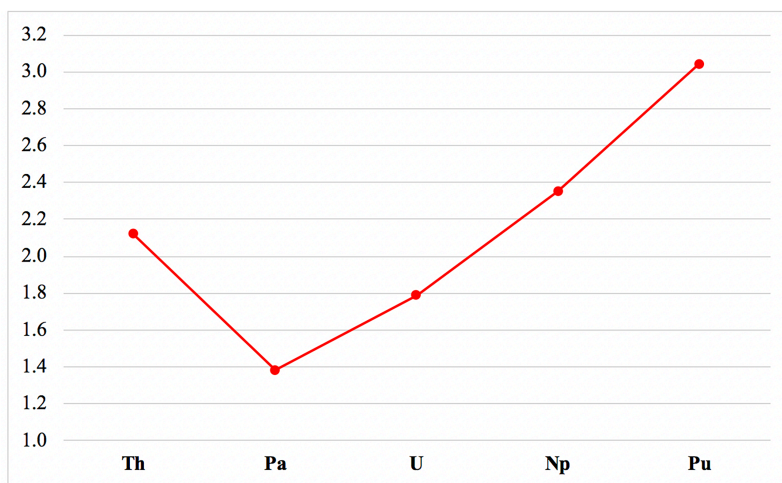

**Supplementary Figure 5.** NPA charges on the M centers in the propene series.



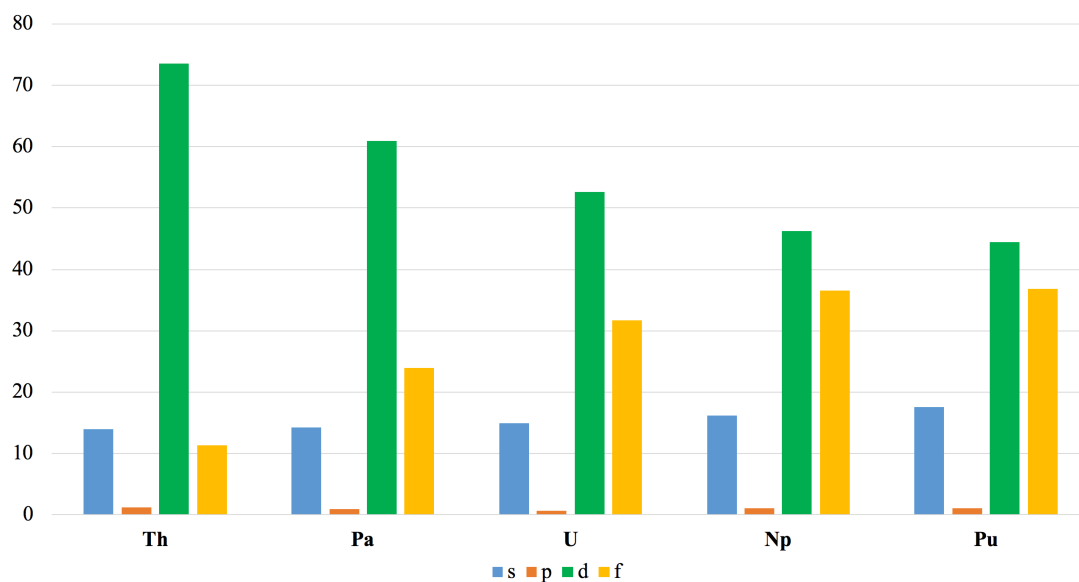

**Supplementary Figure 6.** Composition (%) of the M hybrids in the M-C 2c-2e  $\sigma$  bonds in the propene series.

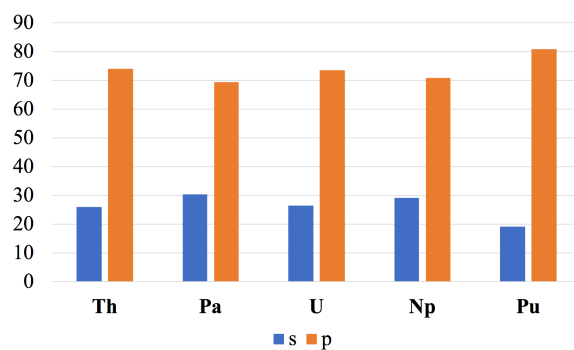

**Supplementary Figure 7.** Composition (%) of the C hybrids in the M-C 2c-2e  $\sigma$  bonds in the propene series.

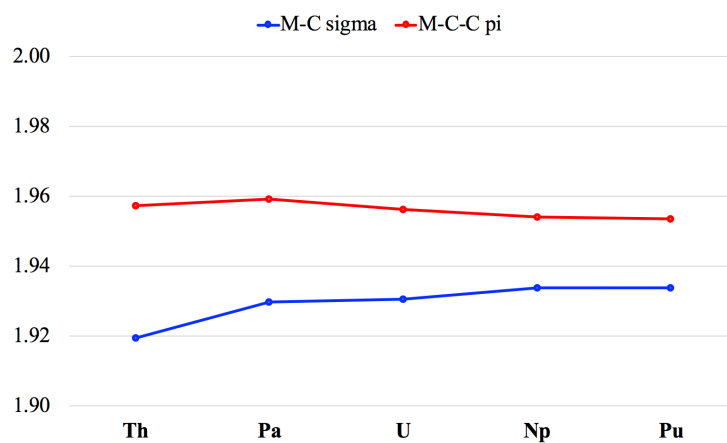

**Supplementary Figure 8.** ON values (in |e|) of the M-C  $\sigma$  and M-C-C  $\pi$  bonds in the propene series.

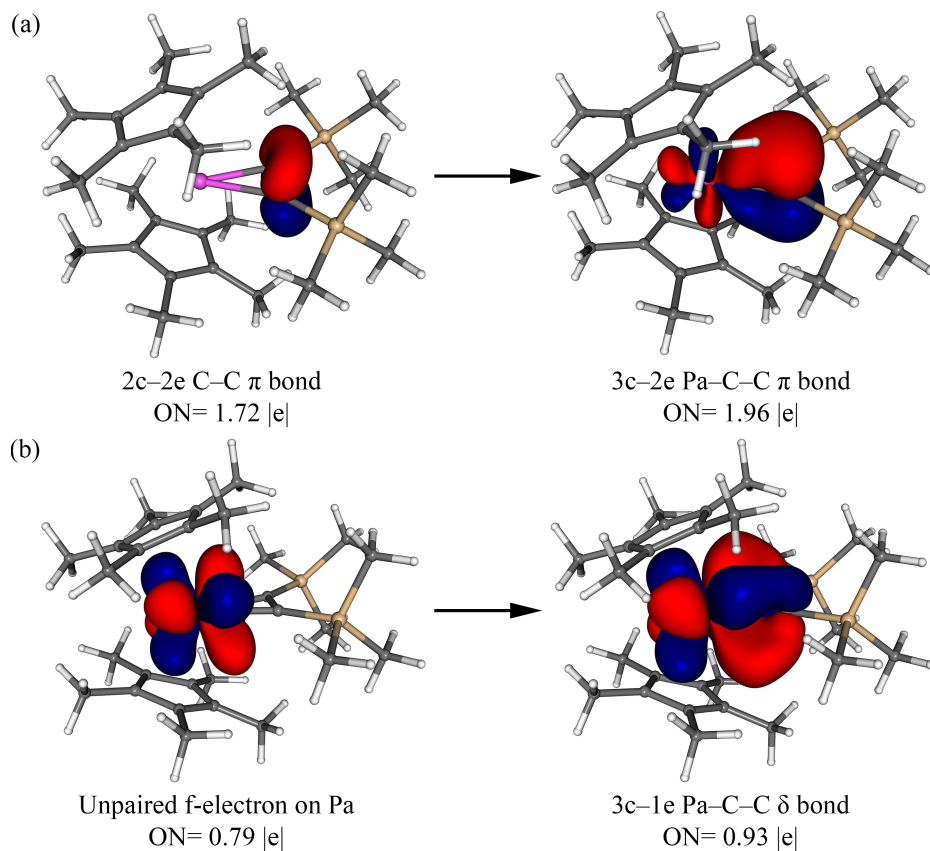

**Supplementary Figure 9.** Involvement of the M center in the  $\pi$  (a) and  $\delta$  (b) bonding with the  $C_2(SiMe_3)_2$  ligand in the propene series in the example of Pa complex.

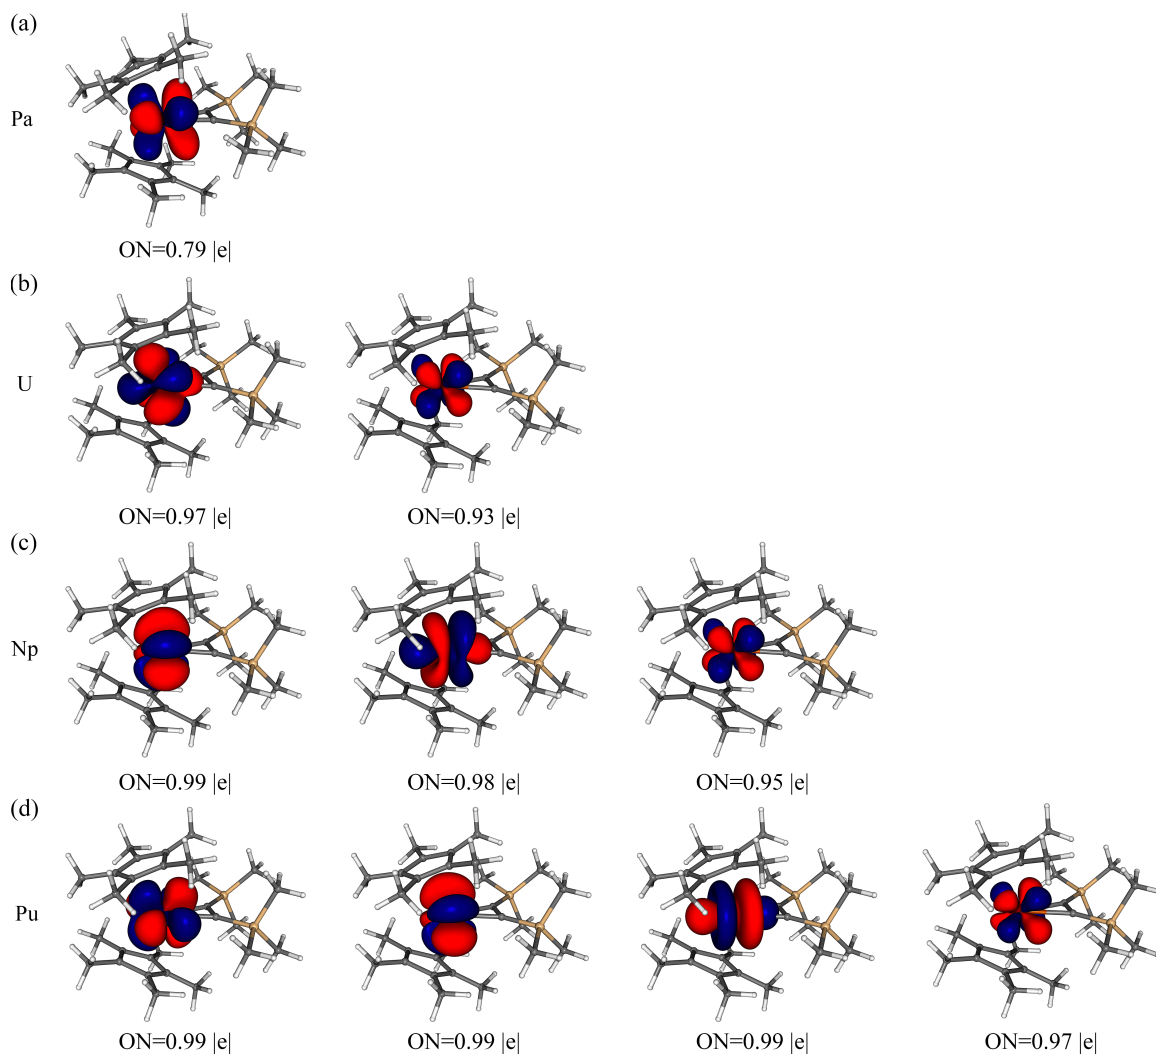

**Supplementary Figure 10.** Unpaired *f*-electrons (1c-1e) on the M centers in the propene series. (a) One *f*-electron of Pa. (b) Two *f*-electrons of U. (c) Three *f*-electrons of Np. (d) Four *f*-electrons of Pu.

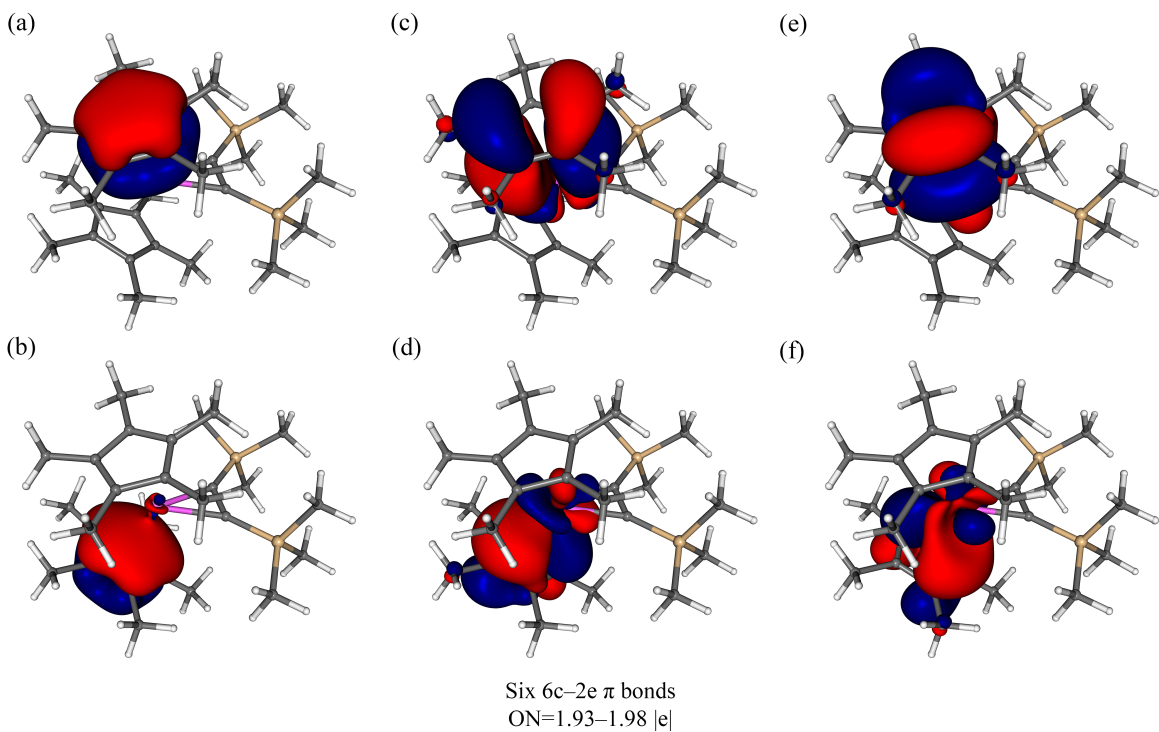

**Supplementary Figure 11.** Six 6c–2e  $\pi$  bonds forming  $\pi$  aromatic sets over  $C_p$  rings in the propene series. The bonds are mainly composed by the  $p_z$ -orbitals of the five C atoms constituting the  $C_p$  ring and the  $df$ -hybridized orbitals of the An atom. While the contribution of the latter into the fully bonding ones (panel a and b) is minor (1–3%), it is appreciably higher (5–12%) in the case of the bonds featuring one nodal plane perpendicular to the  $C_p$  ring (panels c, d, e, and f). Similar six 6c–2e  $\pi$  bonds are found in the cumulene series, where the M contribution into these bonds is assessed to be 2–4% and 6–14%, respectively.

## Supplementary Discussion

### Chemical bonding in metallacyclocumulenes

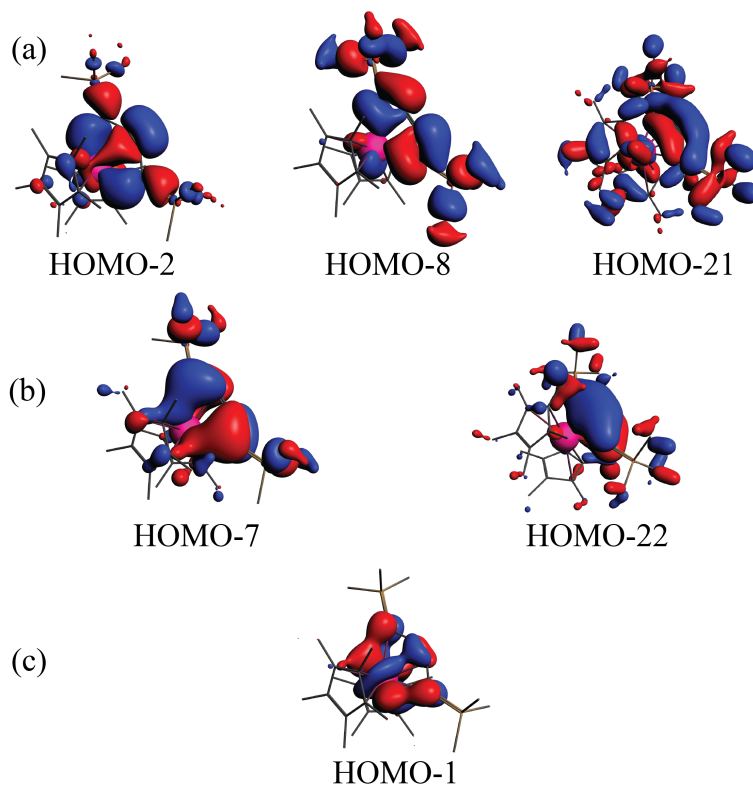

**Supplementary Figure 12.** Selected canonical molecular orbitals for the  $(\eta^5\text{-C}_5\text{Me}_5)_2\text{U}[\eta^4\text{-C}_4(\text{SiMe}_3)_2]$  complex attributed to (a) M–C  $\sigma$  bonds, (b)  $\pi$  bonds, and (c) the  $\varphi$  bond. ISO = 0.025.

Per AdNDP, the following chemical bonding elements have been recovered out of the totally delocalized CMOs as outlined below.

### $\sigma$ bonding

There are 50 covalent 2c-2e  $\sigma$  bonds that constitute the framework of the  $C_5Me_5$  units (20 C-C and 30 C-H  $\sigma$  bonds).

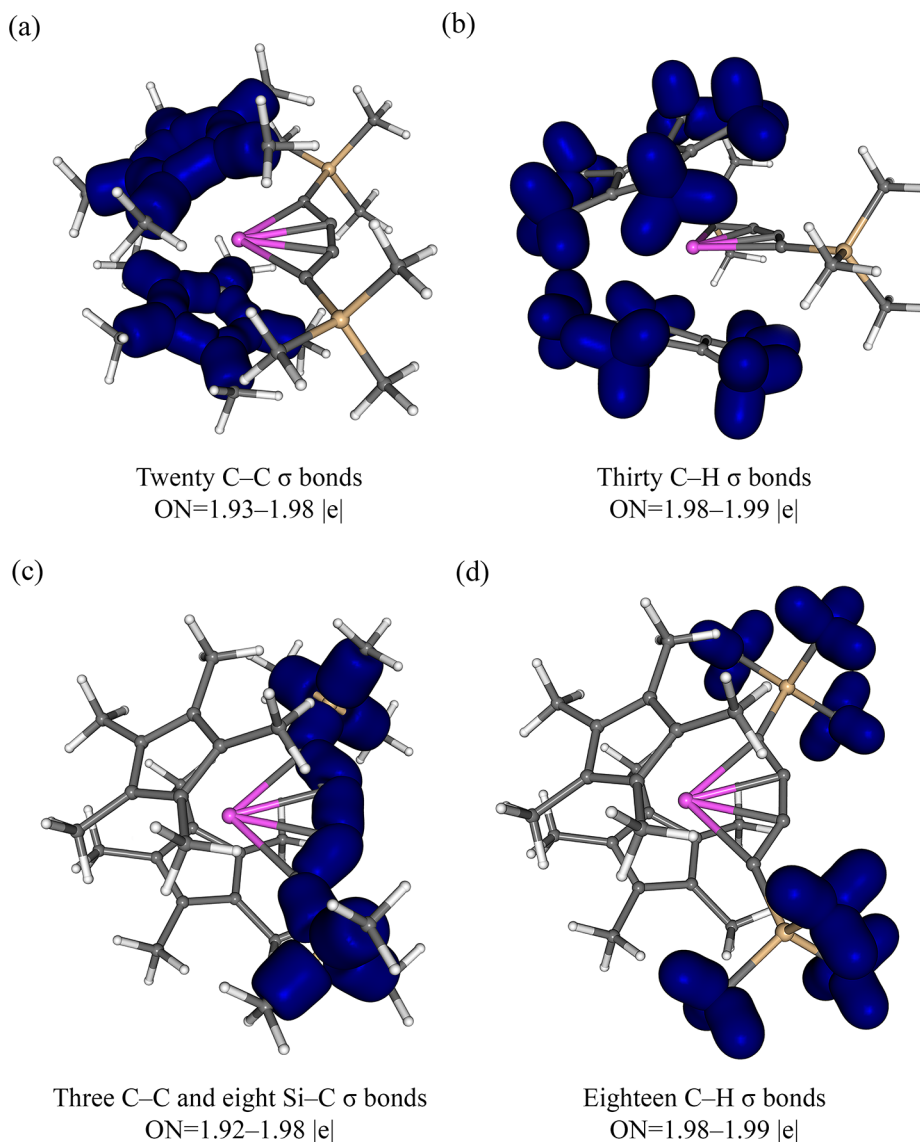

**Supplementary Figure 13.** AdNDP  $\sigma$  bonds found over the (a, b)  $(C_5Me_5)_2$  fragments and (c, d) the  $C_4(SiMe_3)_2$  fragments: (a) Five C-C  $\sigma$  bonds found within each  $C_p$  ring, five C-C  $\sigma$  bonds connecting the  $C_p$  ring and the methyl groups; (b) Thirty C-H  $\sigma$  bonds of the methyl groups connected to  $C_p$  rings; (c) Three C-C and eight Si-C  $\sigma$  bonds; (d) Eighteen C-H  $\sigma$  bonds. All the bonds are shown as superimposed onto the single molecular framework.

As seen from Supplementary Fig. 13, 29 2c–2e  $\sigma$  bonds are responsible for the  $\sigma$  bonding within the  $C_4(SiMe_3)_2$  ligand (3 C–C, 8 Si–C, and 18 C–H  $\sigma$  bonds). Two M– $C_\alpha$   $\sigma$  bonds connect the  $[MC_5Me_5]^{2+}$  moiety with the cumulene ligand (Supplementary Fig. 14a).

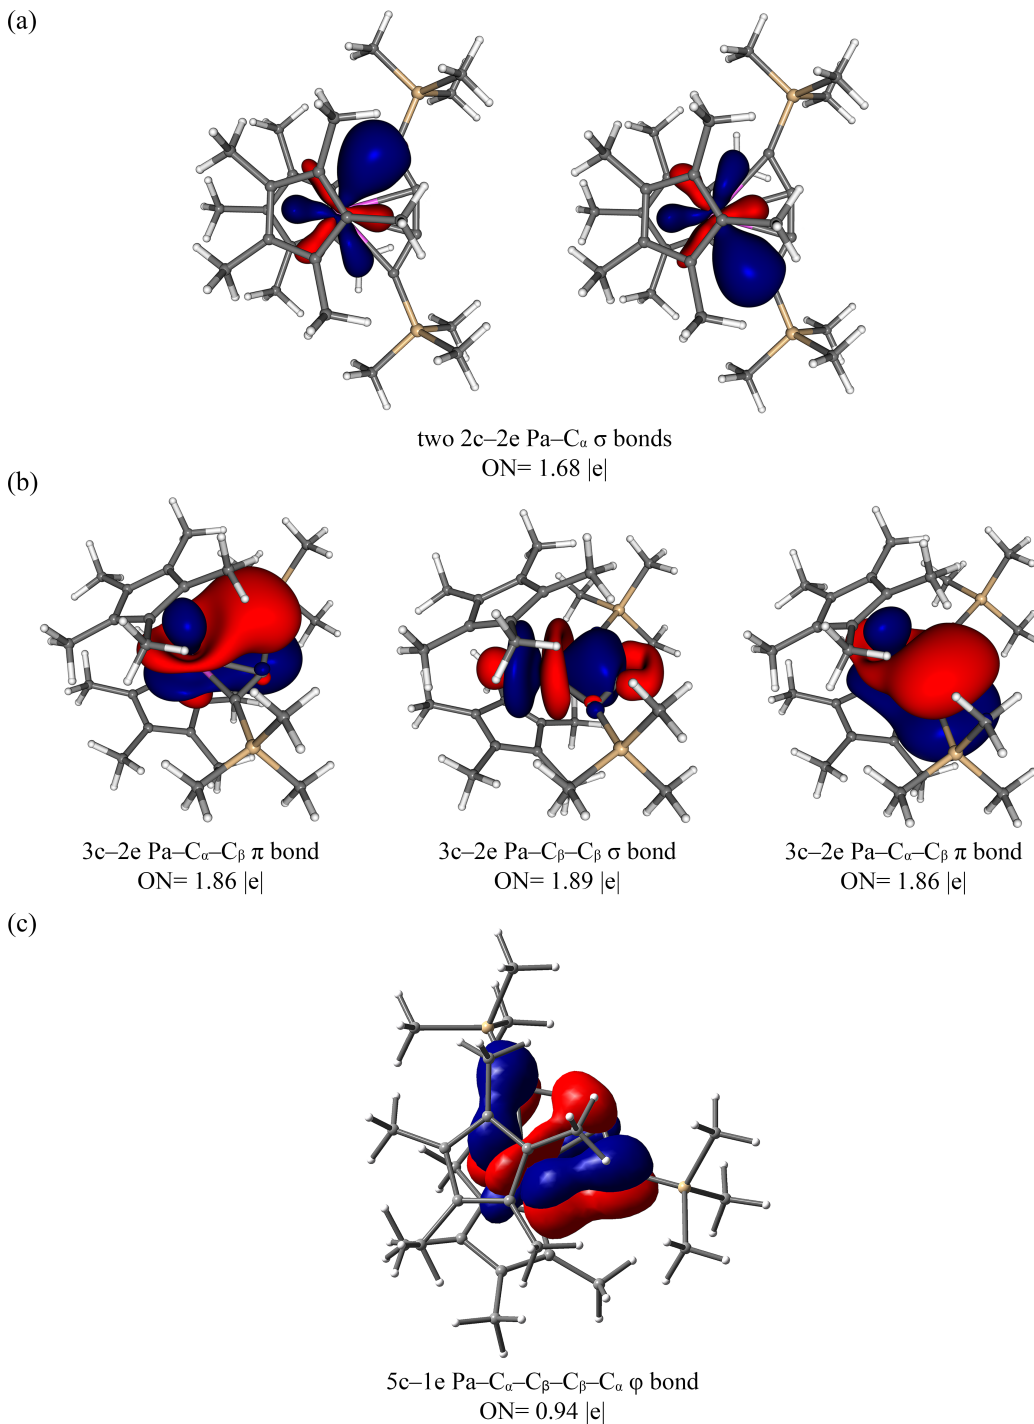

**Supplementary Figure 14.** AdNDP bonding elements found between the  $C_4(SiMe_3)_2$  ligand and the M center in the example of Pa-cumulene complex: (a) Two direct Pa– $C_\alpha$   $\sigma$  bonds; (b) Two peripheral Pa– $C_\alpha$ – $C_\beta$   $\pi$  bonds and one central Pa– $C_\beta$ – $C_\beta$   $\sigma$  bond (this bond is considered as  $\sigma$  with respect to the metal center, but  $\pi$  with respect to the  $C_\beta$ – $C_\beta$  bond); (c) Singly occupied five-center Pa– $C_\alpha$ – $C_\beta$ – $C_\beta$ – $C_\alpha$   $\varphi$  bond.

From one side, the lower ON values of the M–C<sub>α</sub> σ bonds in cumulenes (1.65–1.69 |e|) compared to the corresponding values in propenes (1.92–1.93 |e|) explain the elongation of the M–C bonds in the cumulene *vs.* the propene series (2.46–2.59 Å *vs.* 2.26–2.40 Å, respectively). From the other side, the lower ON values of these σ bonds in cumulenes hint at the electron delocalization within this fragment. As a matter of fact, these direct M–C<sub>α</sub> σ bonds can also be viewed as two 3c–2e σ bonds involving an additional C<sub>β</sub> atom with slightly higher ON values (1.94–1.95 |e|). Contribution of the C<sub>β</sub> atoms to these bonds is assessed to be 13.2–16.0%. This finding suggests that the distance between the metal center and the C<sub>4</sub>(SiMe<sub>3</sub>)<sub>2</sub> ligand is mainly controlled by the M–C<sub>α</sub> interaction, raising the question of why the C<sub>α</sub> atoms – which contribute more electron density to the M–C σ bonds – are located further away than the C<sub>β</sub> atoms. To answer this question, we performed additional calculations for model complexes with less bulky groups attached to the C<sub>α</sub> atoms. When the bulky trimethylsilyl groups bound to the C<sub>α</sub> atoms are substituted for compact hydrogen atoms, the M–C<sub>α</sub> bonds become shorter than M–C<sub>β</sub> bonds, while the ON values of the corresponding bonds stay nearly the same (Supplementary Tables 5, 6). This suggests that steric effects are largely responsible for keeping the M–C<sub>α</sub> bonds longer than M–C<sub>β</sub> bonds, while the electronic effects are minor.

The trend in the NPA charges on the metal center is similar to the propene series, with Th (+1.87) possessing larger charge than U (+1.59) (Supplementary Fig. 15). It shows an approximately 0.7 drop in charges between Th (+1.87) and Pa (+1.17) followed by a consistent increase to Pu (+2.85). Similar to propenes, the NPA charge on the metal center of the Pa complex suggests that its reactivity towards alkynes should be comparable to that of the recently synthesized ( $\eta^5$ -C<sub>5</sub>Me<sub>5</sub>)<sub>2</sub>U[ $\eta^4$ -C<sub>4</sub>(SiMe<sub>3</sub>)<sub>2</sub>] as well as Group 4 cumulenes, whereas the reactivity of the corresponding Np and Pu complexes should be similar to the Th complex. As one would expect, the NPA charges of the corresponding Ti and Zr complexes have quite low values (+1.40 and +1.24, respectively), comparable to those of U (+1.59) and Pa (+1.17) complexes.

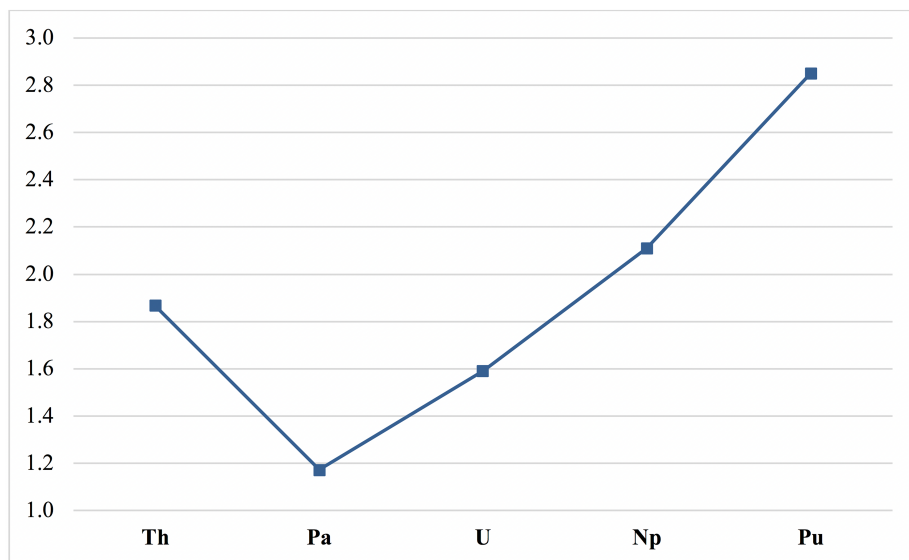

**Supplementary Figure 15.** NPA charges on the M centers in the cumulene series. NPA charges in corresponding Ti and Zr complexes are +1.40 and +1.24, respectively.

As in the propene series, the cumulene M–C σ bonds are primarily formed by hybrid 6*d*–5*f* *An* orbitals with C 2*s*–2*p* hybrid orbitals (Supplementary Figs 16, 17), with increasing *f*- and decreasing *d*-characters across the series from Th to Pu. Likewise, the ON values of the M–C σ bonding does not change significantly in the cumulene series (Supplementary Fig. 18).



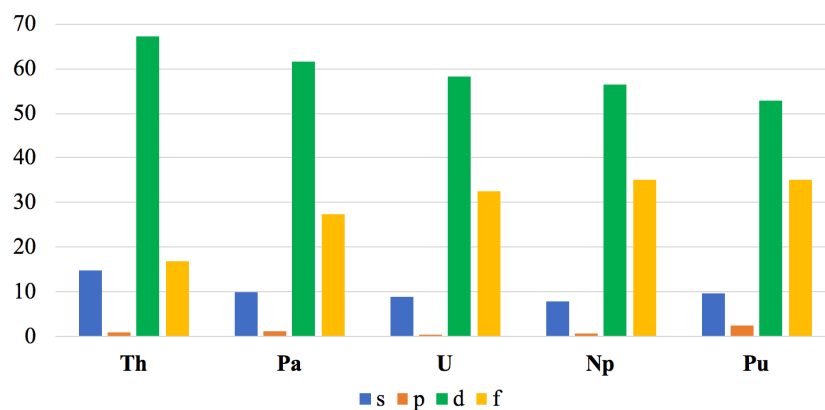

**Supplementary Figure 16.** Composition (in %) of the M hybrids in the M-C $\alpha$  2c-2e  $\sigma$  bonds in the cumulene series.

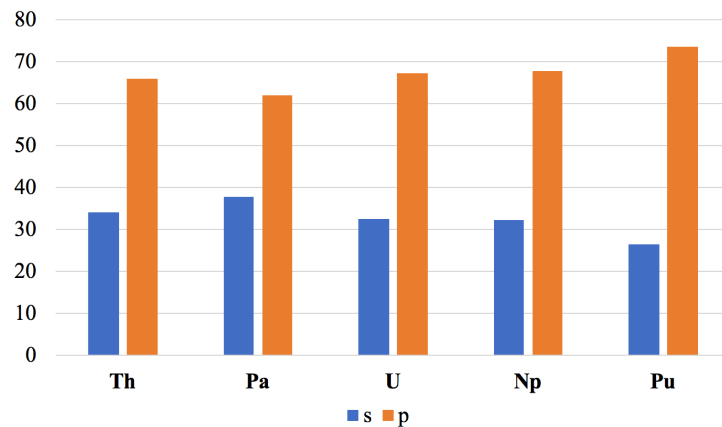

**Supplementary Figure 17.** Composition (in %) of the C $\alpha$  hybrids in the M-C $\alpha$  2c-2e  $\sigma$  bonds in the cumulene series.

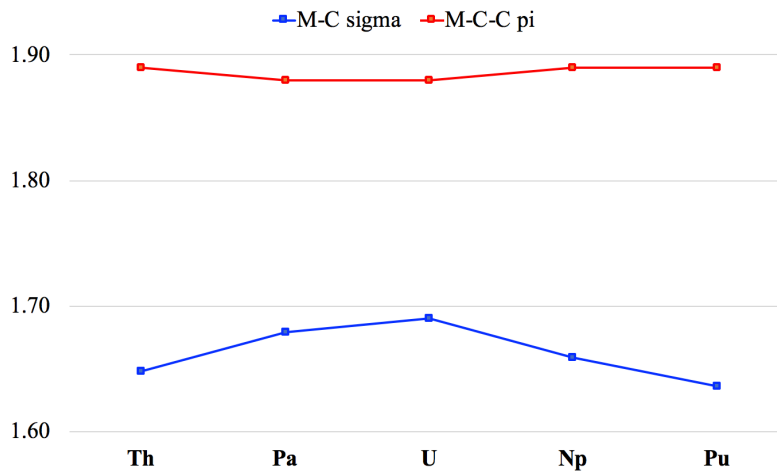

**Supplementary Figure 18.** ON values (in |e|) of the M-C $\alpha$   $\sigma$  bonds and M-C-C  $\pi$  bonds in the cumulene series.

## $\pi$ bonding

The similarity between the cumulenes and propenes extends to their  $\pi$  bonding, though the  $\pi$  interactions are slightly altered in the  $(\eta^5\text{-C}_5\text{Me}_5)_2\text{An}[\eta^4\text{-C}_4(\text{SiMe}_3)_2]$  (An=Th–Pu) compounds by the presence of additional C atoms. AdNDP found two types of  $\pi$  bonding interactions between the  $(\eta^5\text{-C}_5\text{Me}_5)_2\text{An}$  and  $\text{C}_4(\text{SiMe}_3)_2$  fragments associated with one central ( $\text{C}_\beta\text{-C}_\beta$ ) and two peripheral ( $\text{C}_\alpha\text{-C}_\beta$ ) units (Supplementary Fig. 19). Since the  $\text{M-C}_\beta\text{-C}_\beta$  bonding is due to the L–M donation of the  $\pi$  density of the  $\text{C}_\beta\text{-C}_\beta$  fragment to the  $df$ -hybrid orbital of the metal center, we call it  $\pi$  interaction. However, the  $\text{M-C}_\beta\text{-C}_\beta$   $\pi$  bonding is indeed formally considered as  $\sigma$  interaction with respect to the metal center. The  $\text{M-C}_\beta\text{-C}_\beta$  and  $\text{M-C}_\alpha\text{-C}_\beta$   $\pi$  bonds are mutually perpendicular, and are responsible for the double bond character within the four C atoms of the cumulene moiety. These  $3c\text{-}2e$  bonds can also be viewed as  $2c\text{-}2e$  C–C bonds, though with lower ON values (1.62–1.76 |e|). This hints at  $\pi$  electron delocalization over neighboring atoms (Supplementary Fig. 19). Indeed, upon inclusion of the M atom, the ON values increase to 1.86–1.92 |e|. The L–M  $\pi$  donation is found to be the largest for U (0.58 |e|) and the smallest for Th (0.37 |e|) (Fig. 6b). The larger donation to U compared to the Th center is in agreement with the experimental values of the M–C bonds in the U (avg. 2.45 Å) and Th (avg. 2.54 Å) cumulene complexes. However, similar to the propene series, the combined  $\sigma+\pi$  L–M trend does not fully explain the peculiar trend of the M–C distances observed in the An series (Figs. 3a, 6c). Specifically, the Pa-cumulene distances are the shortest in series, while the largest  $\sigma+\pi$  L–M donation is found for the U counterpart.

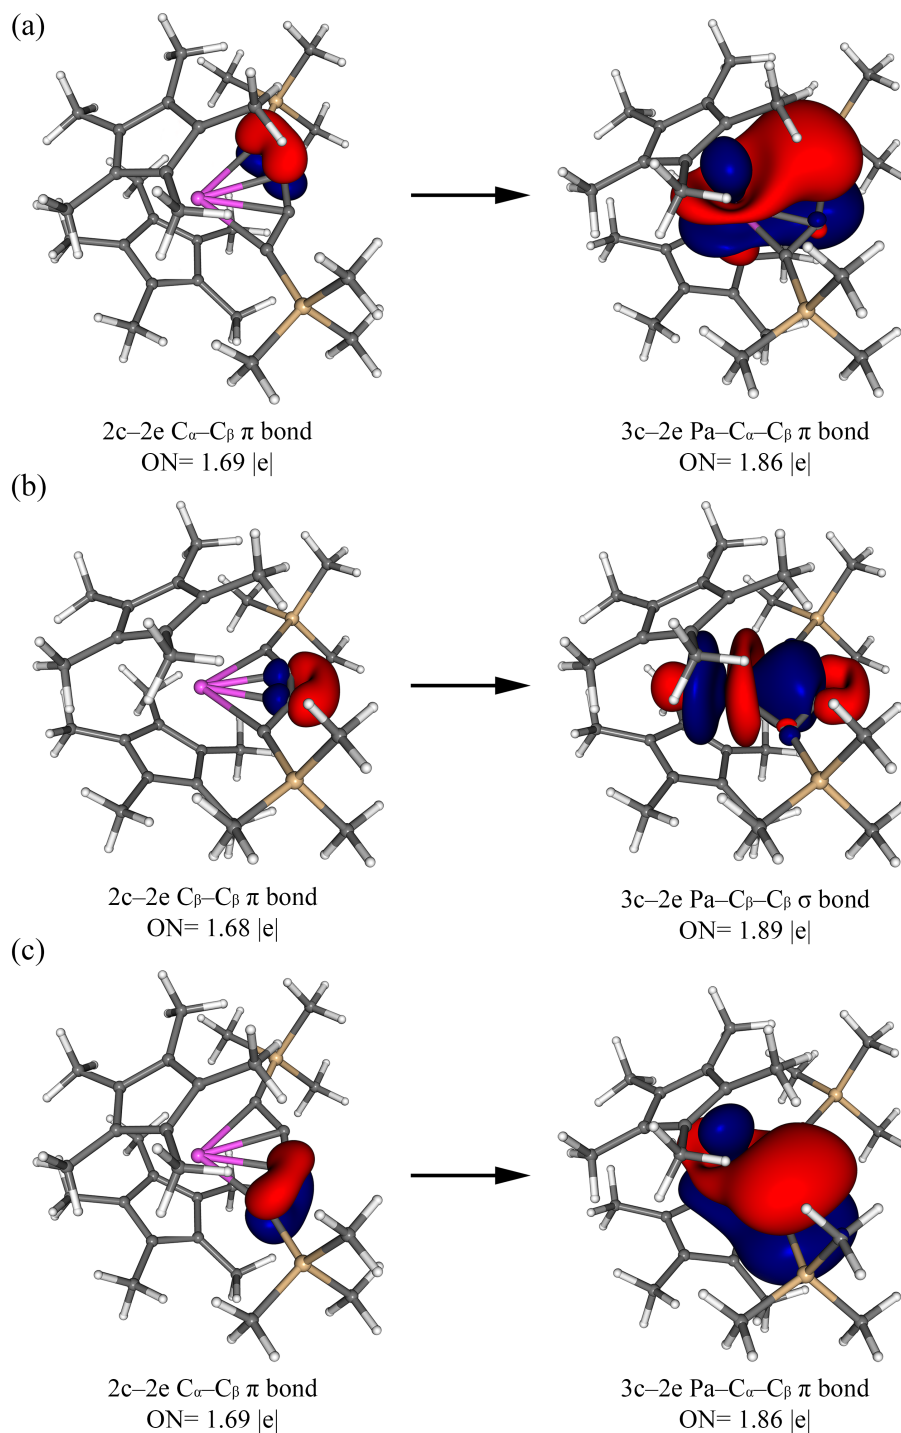

**Supplementary Figure 19.** Involvement of the M center in the  $\pi$  bonding with the C<sub>4</sub>(SiMe<sub>3</sub>)<sub>2</sub> ligand in the cumulene series in the example of Pa complex. (a) Representation of the 2c-2e C $\alpha$ -C $\beta$   $\pi$  bond (left) as a 3c-2e Pa-C $\alpha$ -C $\beta$   $\pi$  bond (right). (b) Representation of the 2c-2e C $\beta$ -C $\beta$   $\pi$  bond (left) as a 3c-2e Pa-C $\beta$ -C $\beta$   $\sigma$  bond (right). The 3c-2e Pa-C $\beta$ -C $\beta$  bond is considered as  $\sigma$  with respect to the metal center, but  $\pi$  with respect to the C $\beta$ -C $\beta$  bond. (c) (a) Representation of the 2c-2e C $\alpha$ -C $\beta$   $\pi$  bond (left) as a 3c-2e Pa-C $\alpha$ -C $\beta$   $\pi$  bond (right).

## $\phi$ bonding

While the strength of the interaction between the An atom and the cumulene fragment is primarily dominated by the strength of their  $\sigma$  and  $\pi$  bonding (Fig. 6c), these two interactions alone do not fully explain the peculiar trend of the M–C distances observed in the An series (Fig. 3a). Indeed, excepting Pa, the combined  $\sigma + \pi$  L–M interactions can account for the M–C bond length decrease from Th to Pa and follow-up constant increase from Pa to Pu, thus defying the anticipated trend of ionic radii in actinides. However, there is more one interaction, which is found to be the strongest in the case of the Pa complex, *i.e.* M–L  $\phi$  back-bonding (Fig. 6d) that helps to bring the donation trend in full consistency with the M–C bond trend (Figs. 3a, 6e).

Specifically, one of the unpaired  $f$ -electrons of the M atom, which has the lowest ON value (Supplementary Fig. 20), participates in a  $\phi$  bond with the four C atoms of the  $C_4(\text{SiMe}_3)_2$  fragment. Similar to the Group 4 cumulenes, no  $\phi$  bonding interaction is observed in the case of the Th complex due to the absence of  $f$ -electrons. The 5c–1e  $\phi$  bond is formed due to the promotion of the electron density from the singly occupied  $5f_{xz}^2$  orbital of the An atom into the  $\pi^*$  orbital of the four C atoms of the  $C_4(\text{SiMe}_3)_2$  ligand (Supplementary Fig. 21). It features three nodal planes: one nodal plane going through the plane of the four C atoms in addition to two perpendicular nodal planes, in between the  $C_\alpha$  and  $C_\beta$  atoms on both sides of the ligand. This unprecedented 5c–1e  $\phi$  bond is the first example of the “side-to-side” M–L  $\phi$  interaction occurring between the  $5f$  orbital of the metal and the  $\pi^*$  orbital of the ligand.

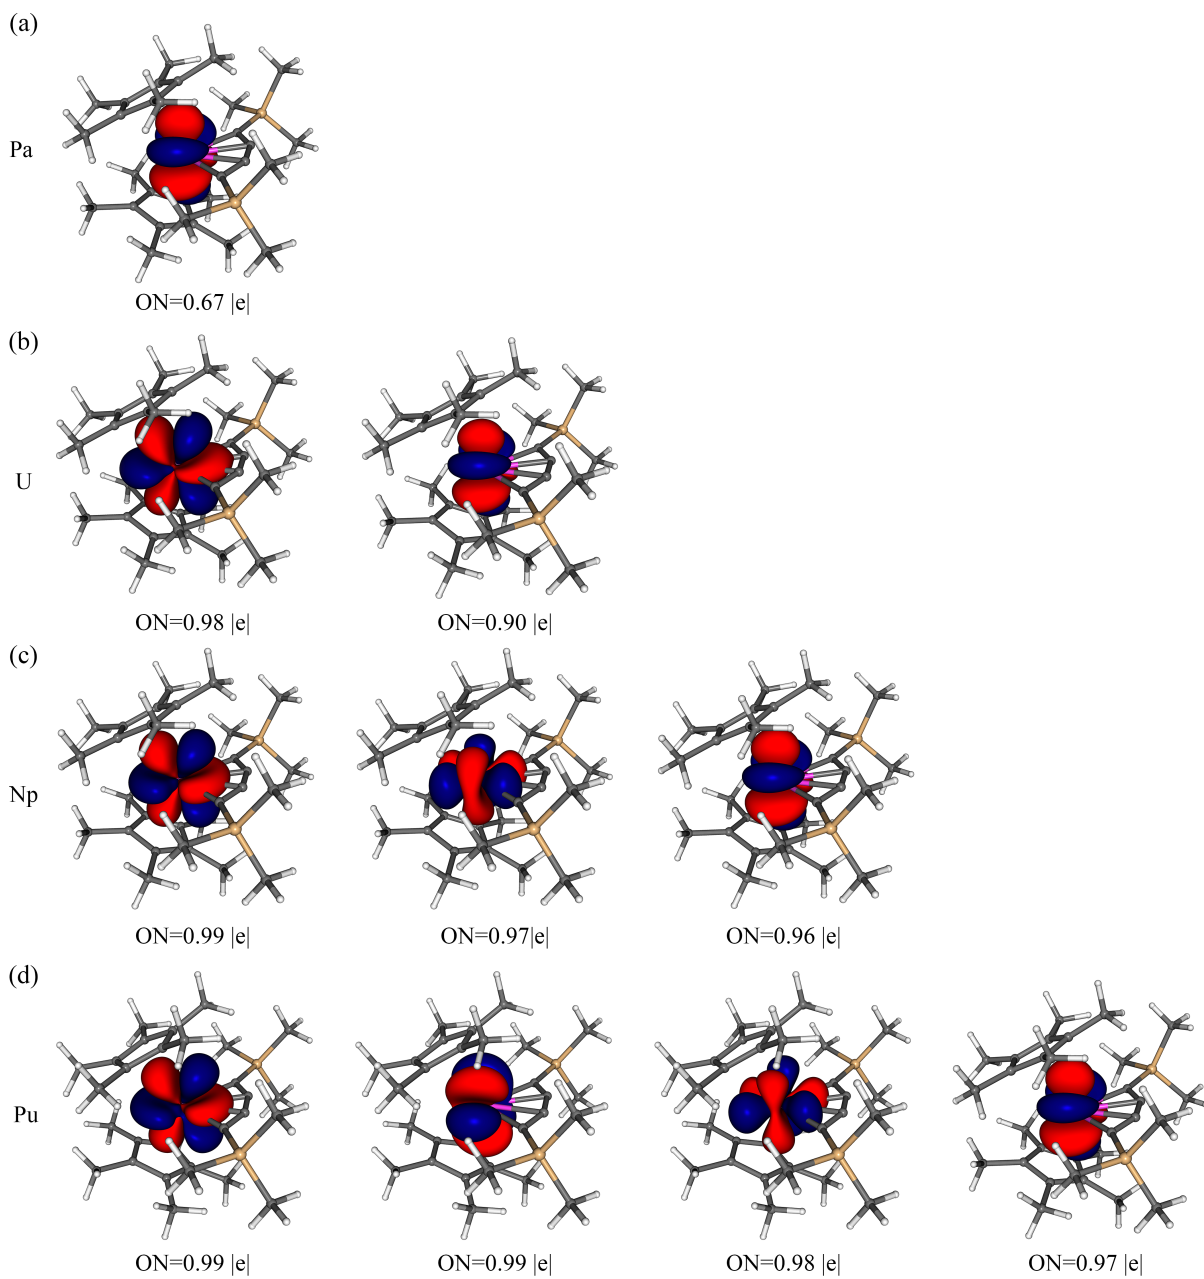

**Supplementary Figure 20.** Unpaired *f*-electrons (1c-1e) on the M centers in the cumulene series. (a) One *f*-electron of Pa. (b) Two *f*-electrons of U. (c) Three *f*-electrons of Np. (d) Four *f*-electrons of Pu.

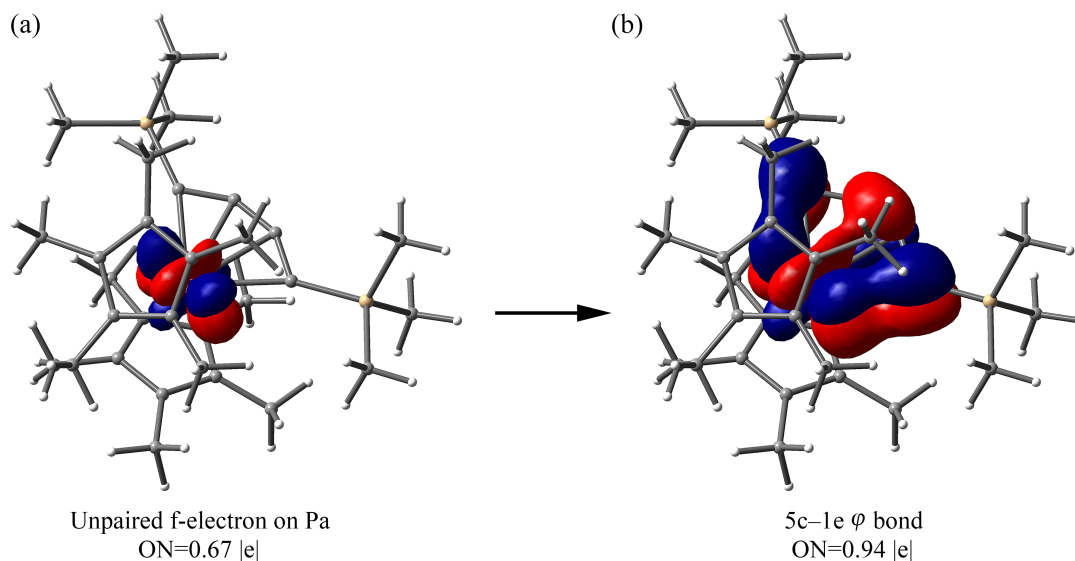

**Supplementary Figure 21.** Involvement of the M center (1c-1e, f-electron) (a) in the  $\varphi$  bonding with the  $C_4(\text{SiMe}_3)_2$  ligand (5c-1e M-C-C-C-C) (b) in the cumulene series in the example of Pa complex.

On one hand, the  $\varphi$  back-donation is expected destabilize the  $C_\alpha$ - $C_\beta$  bonds due to their antibonding characters with respect to one another as well as to stabilize  $C_\beta$ - $C_\beta$  exhibiting bonding interactions. The degree of the  $\varphi$  back-donation within the series (Fig. 6d) is in agreement with the  $C_\alpha$ - $C_\beta$  bond lengths, confirming the longest  $C_\alpha$ - $C_\beta$  bonds in the Pa complex featuring the largest  $\varphi$  back-bonding. In contrast to the  $C_\alpha$ - $C_\beta$  bond length trend, the  $C_\beta$ - $C_\beta$  bonds stay nearly the same along the series. This in agreement with the fact that the back-donation to the central  $C_\beta$  atoms is significantly smaller (27%) than to the peripheral  $C_\alpha$  (73%).

On the other hand, the  $\varphi$  back-donation is expected to stabilize the M- $C_\alpha$  interaction, resulting in shorter M- $C_\alpha$  bonds depending on the degree of such donation. As in propenes, the M-L  $\varphi$  back-bonding is strongest in Pa (0.27 |e|); however, the  $\varphi$  interaction of U (0.08 |e|) cumulene is significantly stronger than that of Np (0.02 |e|) or Pu (0.02 |e|). While the U-cumulene  $\varphi$  back-donation is still considered as a minor effect since it does not impact the overall donation trend, it does so in the case of Pa. Specifically, accounting for the M-L  $\varphi$  donation results in the highest overall donation value for Pa instead of U (Fig. 6e), in agreement with the shortest Pa-cumulene distance. Although the  $\varphi$  back-donation is small for Np (0.02 |e|) and Pu (0.02 |e|), it grows to 0.08 |e| in U, and to 0.27 |e| in Pa, for which it is even larger than the direct L-M  $\pi$  donation from any C-C  $\pi$  bonds taken alone (0.18 |e|, 0.19 |e|). Overall, presence of the M-L  $\varphi$  interactions in the cumulenes supports the observed M-C bond length trend, thus confirming its indispensable role in explaining of the peculiar geometrical changes found in the cumulene series, particularly for Pa.

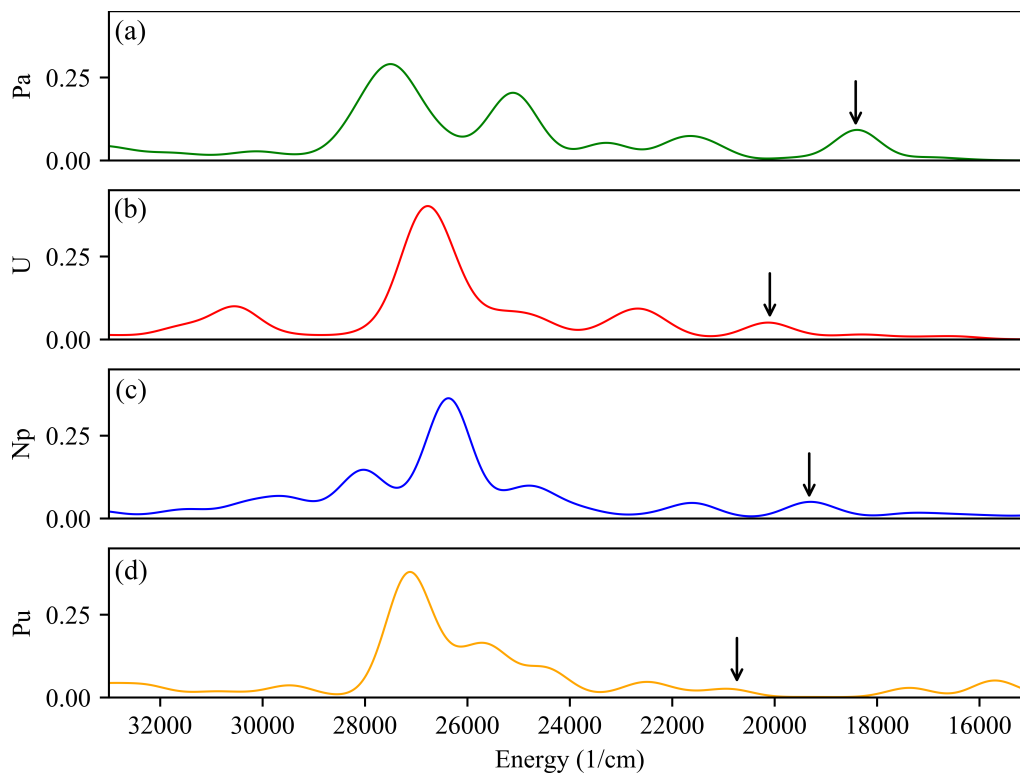

**Supplementary Figure 22.** Calculated UV-Visible-NIR electron absorption spectra for  $(C_5Me_5)_2An(\eta^4-1,2,3,4-Ph_4Ph)$  ( $An = Pa$  (a),  $U$  (b),  $Np$  (c),  $Pu$  (d)), UV-Vis region. Arrows point to the peaks corresponding to the transitions involving the  $\phi$  bonding orbital.

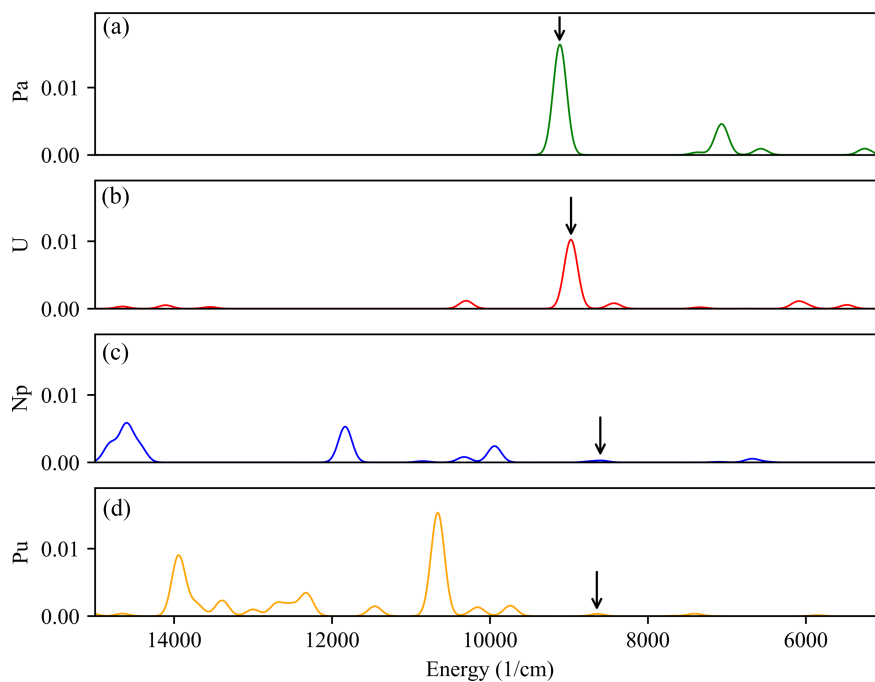

**Supplementary Figure 23.** Calculated UV-Visible-NIR electron absorption spectra for  $(C_5Me_5)_2An(\eta^4-1,2,3,4-Ph_4Ph)$  ( $An = Pa$  (a),  $U$  (b),  $Np$  (c),  $Pu$  (d)), near-IR region. Plotted separately from UV-Vis region due to much lower intensity. Arrows point to the peaks corresponding to the transitions involving the  $\phi$  bonding orbital.

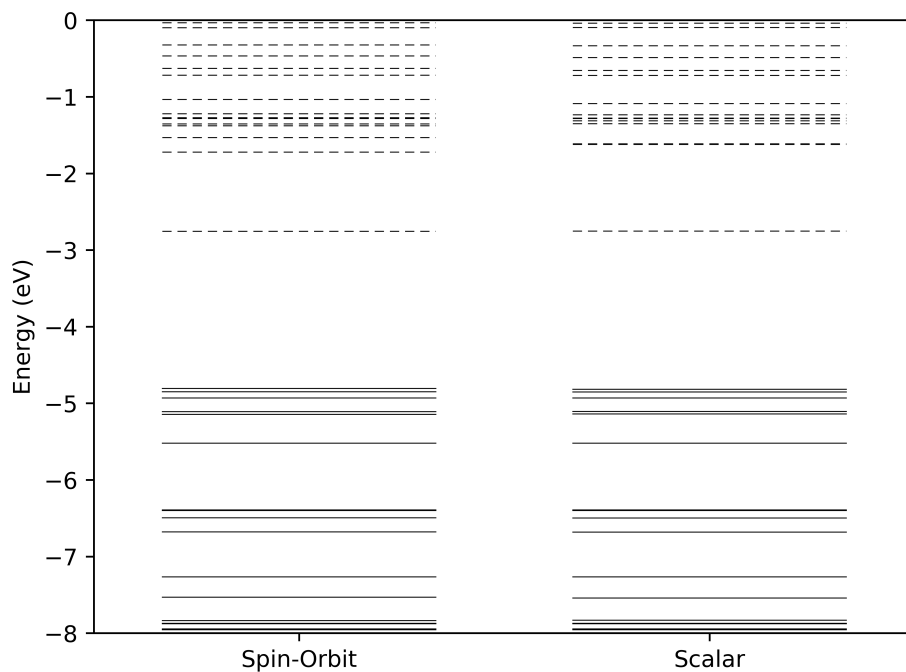

**Supplementary Figure 24.** Molecular orbital energy levels in the  $(\eta^5\text{-C}_5\text{Me}_5)_2\text{Th}[\eta^4\text{-C}_2(\text{SiMe}_3)_2]$  complex using spin-orbit coupling and scalar methods. Solid lines depict occupied orbitals, dashed lines unoccupied orbitals.

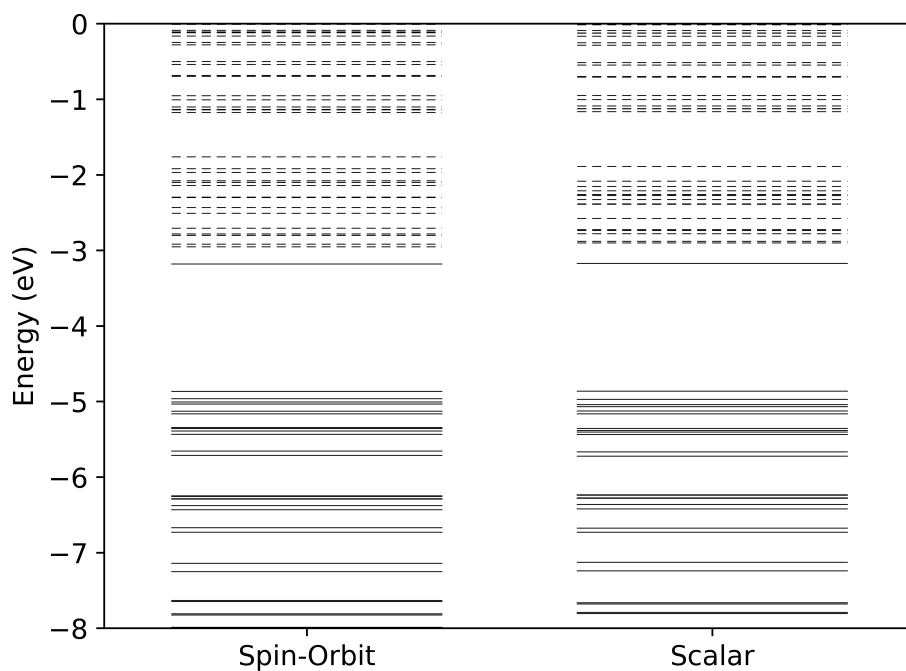

**Supplementary Figure 25.** Molecular orbital energy levels in the  $(\eta^5\text{-C}_5\text{Me}_5)_2\text{Pa}[\eta^4\text{-C}_2(\text{SiMe}_3)_2]$  complex using spin-orbit coupling and scalar methods. Solid lines depict occupied orbitals, dashed lines unoccupied orbitals.



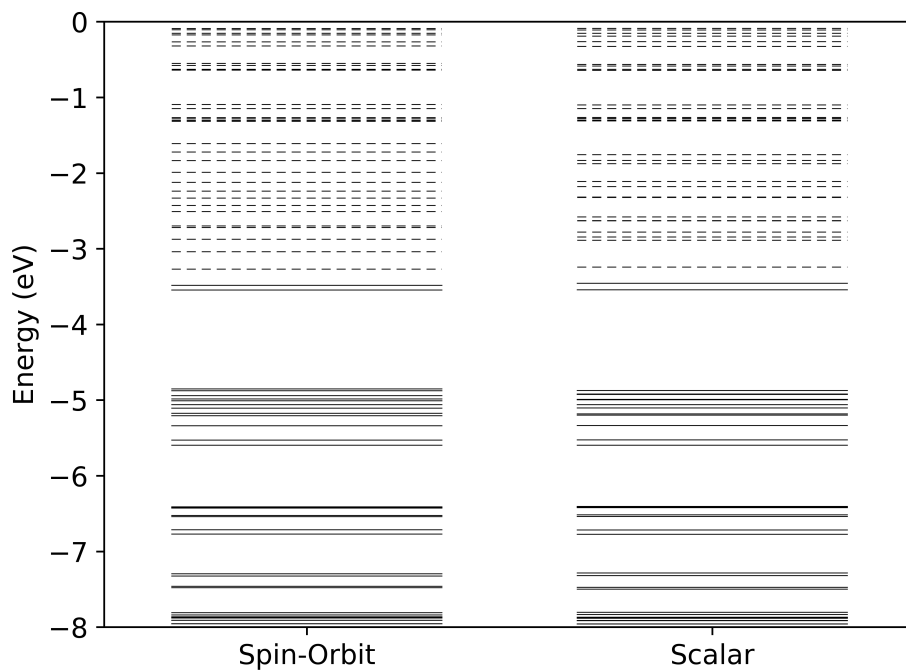

**Supplementary Figure 26.** Molecular orbital energy levels in the  $(\eta^5\text{-C}_5\text{Me}_5)_2\text{U}[\eta^4\text{-C}_2(\text{SiMe}_3)_2]$  complex using spin-orbit coupling and scalar methods. Solid lines depict occupied orbitals, dashed lines unoccupied orbitals.

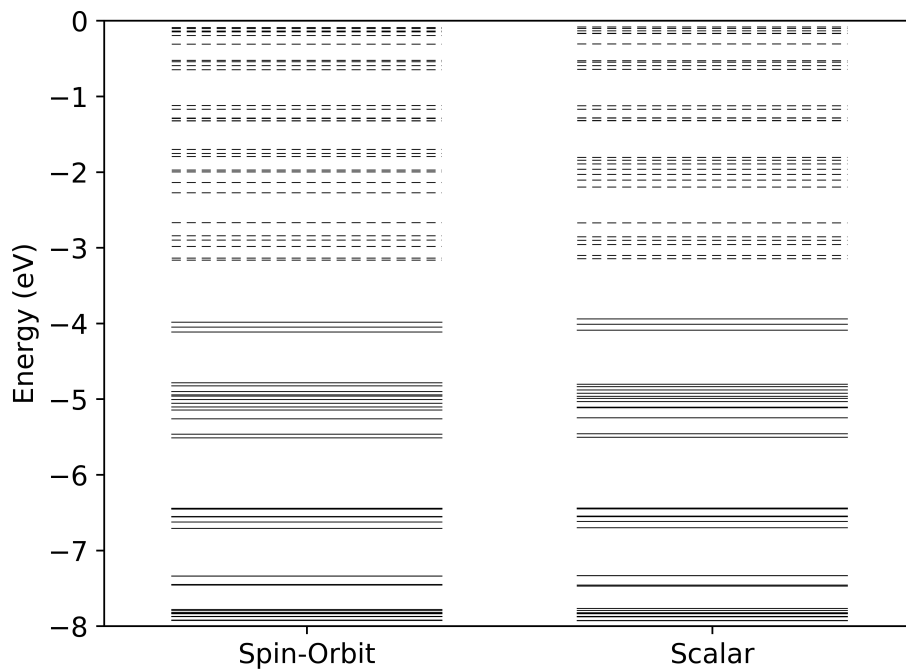

**Supplementary Figure 27.** Molecular orbital energy levels in the  $(\eta^5\text{-C}_5\text{Me}_5)_2\text{Np}[\eta^4\text{-C}_2(\text{SiMe}_3)_2]$  complex using spin-orbit coupling and scalar methods. Solid lines depict occupied orbitals, dashed lines unoccupied orbitals.

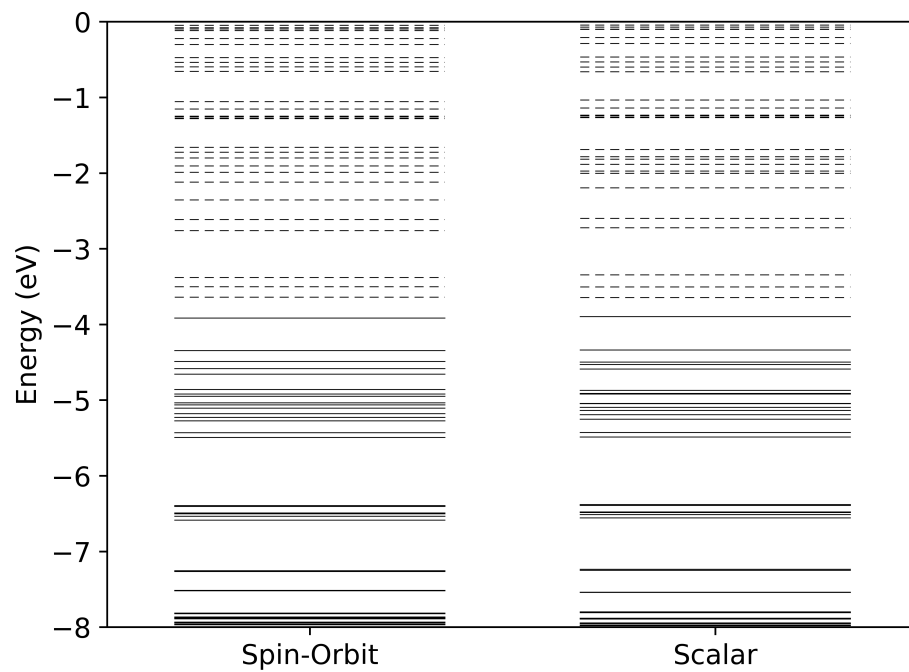

**Supplementary Figure 28.** Molecular orbital energy levels in the  $(\eta^5\text{-C}_5\text{Me}_5)_2\text{Pu}[\eta^4\text{-C}_2(\text{SiMe}_3)_2]$  complex using spin-orbit coupling and scalar methods. Solid lines depict occupied orbitals, dashed lines unoccupied orbitals.

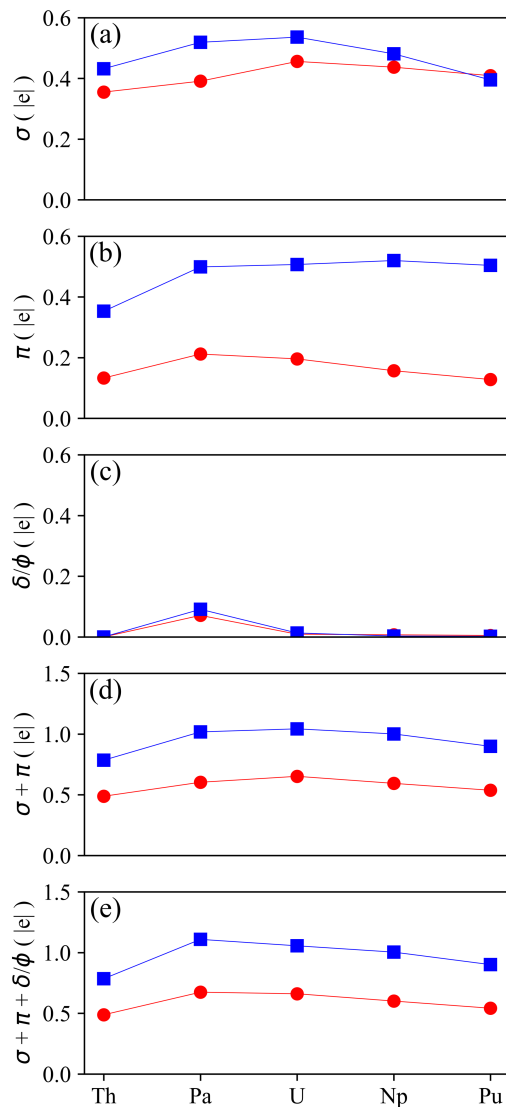

**Supplementary Figure 29.** Magnitude of the direct L–M  $\sigma$  and  $\pi$  donations and M–L  $\delta$  or  $\phi$  back-donation between the  $C_2(SiMe_3)_2$  (propene series ( $\delta$ ), red circles) and  $C_4(SiMe_3)_2$  (cumulene series ( $\phi$ ), blue squares) ligands and the M center in the Th–Pu series. (a) L–M  $\sigma$  donation. (b) L–M  $\pi$  donation. (c) M–L  $\delta/\phi$  back-donation. (d) L–M ( $\sigma+\pi$ ) donation. (e) Overall ( $\sigma+\pi+\delta/\phi$ ) donation. Data taken from hybrid PBE0 calculations; compare to Figure 6.

## CASSCF calculations

In order to assess the multi-reference character of the electronic wave-function in the Pa, U, Np and Pu derivatives of the cumulene series, CASSCF calculations with an active space containing ligand orbitals of the cumulene ligand were carried out. The calculations confirmed the strong multi-reference character of the wave functions of the ground spin-orbit state for each system. As expected from Hund's rules, the ground state wave function is dominated by determinants of the highest spin state in all cases: doublet for Pa, triplet for U, quartet for Np, and quintet for Pu. Specifically, CASSCF calculations considering the 6  $\sigma$ - and  $\pi$ -type orbitals that describe the  $\pi$  bonds in the cumulene ligand (3 bonding orbitals + 3 anti-bonding orbitals) were performed. Indeed, these orbitals are more likely to mix with the metal f orbitals than those describing  $\sigma$  bonds within the cumulene ligand.

Since CASSCF calculations rapidly become expensive with increasing active space, not all f orbitals are included in the active space. The number of f orbitals to be included is determined using ab initio ligand field theory (AILFT). Details about this approach can be found in the supplementary information attached to Jung *et al.* Inorg. Chem. 2017, 56, 8802-8816. In a nutshell, in this approach, the CASSCF energies and wave functions of a CAS(n,7) calculation are fitted against a model Hamiltonian that incorporates the effects of electron-electron repulsion, spin-orbit coupling and ligand field interactions. The fit yields a series of parameters for each of the aforementioned interactions. In the case of ligand field interactions, the fit yields the 7x7 matrix of the ligand field Hamiltonian expressed in the basis of the real f-orbitals. The functions that diagonalize this matrix are called ligand field orbitals. They effectively describe how the ligand field interaction splits energetically the seven f orbitals. The shape and relative energy of these orbitals are shown in Supplementary Figure 30 for the cumulene series. The orbitals included in the active space are shown with a black box for each derivative.

The number of computed roots depends on the number of metal orbitals included in the active space, such that only roots contributing to the ground spin-orbit state are computed. Despite the contribution of lower spin states highlighted in the CAS(n,7) calculations, only roots of the highest spin multiplicity are considered for each system. All roots are equally weighted in the state average calculation. Supplementary Table 9 summarizes the computational settings for each system.

**Supplementary Table 9.** Summary of the CASSCF - extended active space.

|                                          | Pa             | U              | Np             | Pu             |
|------------------------------------------|----------------|----------------|----------------|----------------|
| Configuration                            | f <sup>1</sup> | f <sup>2</sup> | f <sup>3</sup> | f <sup>4</sup> |
| Active space                             | CAS(7,9)       | CAS(8,9)       | CAS(9,12)      | CAS(10,13)     |
| Number of f orbitals in the active space | 3              | 3              | 6              | 7              |
| Spin multiplicities (S)                  | 1/2            | 1              | 3/2            | 2              |
| Number of roots                          | 3              | 3              | 4              | 2              |

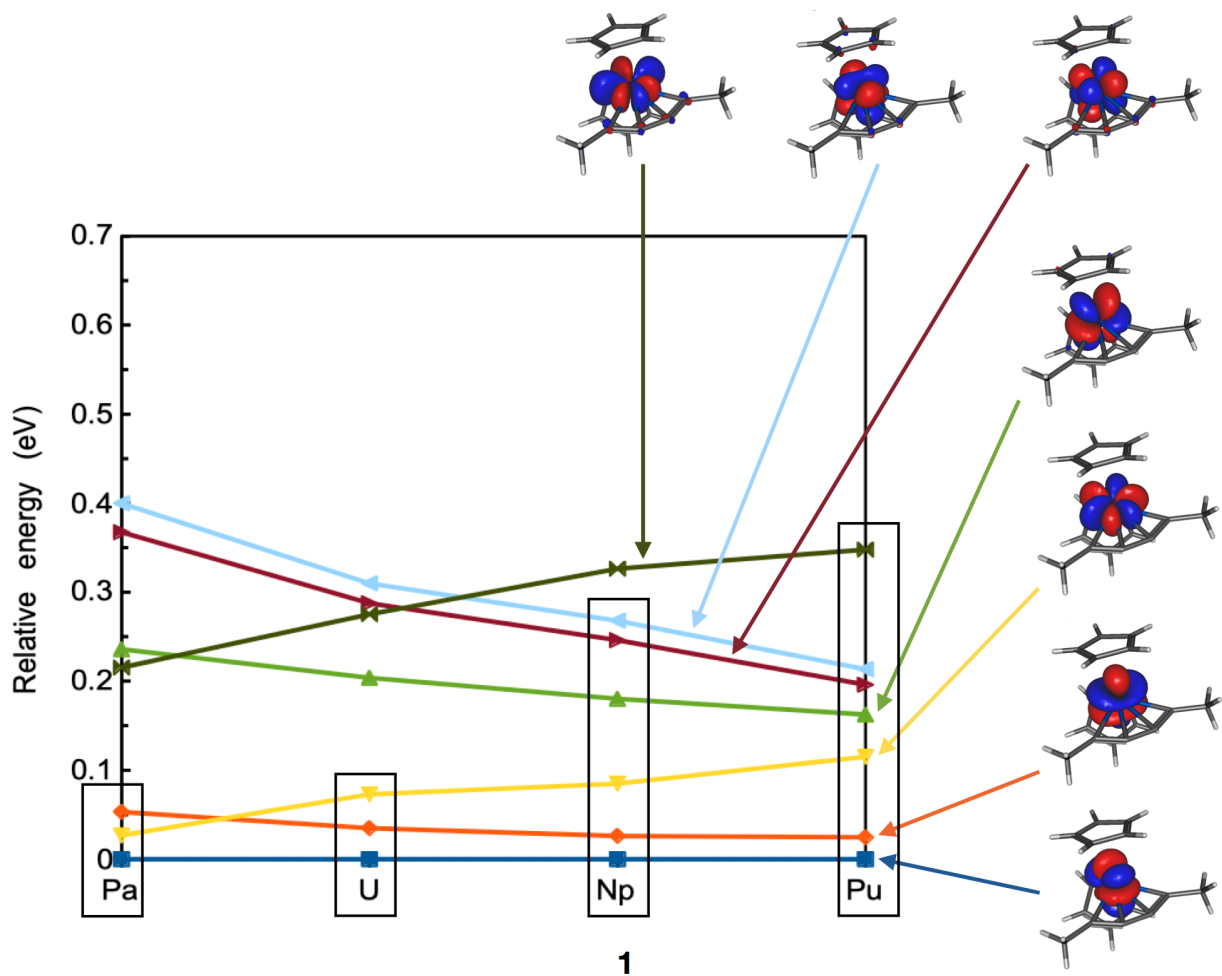

**Supplementary Figure 30.** Crystal field splitting of the f orbitals. The black box represents the orbitals included in the active space.

The active space orbitals of the extended CAS calculations are shown in Supplementary Figures 31, 32, 33, and 34 for the Pa, U, Np and Pu derivatives, respectively. The associated ground spin orbit state wave functions are shown in Supplementary Tables 10, 11, 12, and 13, respectively.

|       |                                                                                    |                                                                                     |                                                                                      |
|-------|------------------------------------------------------------------------------------|-------------------------------------------------------------------------------------|--------------------------------------------------------------------------------------|
| comp. | 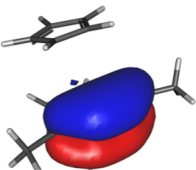  |   |   |
|       | <b>A</b>                                                                           | <b>B</b>                                                                            | <b>C</b>                                                                             |
|       | 64% C(int)<br>24% C(ext)                                                           | 82% C(int)<br>7% C(ext)                                                             | 33% C(int)<br>50% C(ext)                                                             |
|       | 5% Pa(f)<br>3% Pa(d)                                                               | 2% Pa(f)<br>5% Pa(d)                                                                | 7% Pa(f)<br>3% Pa(d)                                                                 |
| comp. |   |   |   |
|       | <b>D</b>                                                                           | <b>E</b>                                                                            | <b>F</b>                                                                             |
|       | 0% C(int)<br>0% C(ext)                                                             | 1% C(int)<br>0% C(ext)                                                              | 1% C(int)<br>2% C(ext)                                                               |
|       | 94% Pa(f)<br>3% Pa(d)                                                              | 93% Pa(f)<br>4% Pa(d)                                                               | 96% Pa(f)<br>0% Pa(d)                                                                |
| comp. |  |  |  |
|       | <b>G</b>                                                                           | <b>H</b>                                                                            | <b>I</b>                                                                             |
|       | 34% C(int)<br>54% C(ext)                                                           | 82% C(int)<br>13% C(ext)                                                            | 66% C(int)<br>29% C(ext)                                                             |
|       | 4% Pa(f)<br>0% Pa(d)                                                               | 2% Pa(f)<br>1% Pa(d)                                                                | 1% Pa(f)<br>1% Pa(d)                                                                 |

**Supplementary Figure 31.** Active space MOs for the Pa derivative, with their composition in terms of atomic orbitals (isosurface = 0.03). C(int) corresponds to the internal carbon atoms, while C(ext) corresponds to the peripheral carbon atoms of the cumulene ligand. Orbitals A (G), B (H), and C(I) are the bonding (anti-bonding) orbitals built from the  $\pi$  bond in the cumulene ligand. Orbitals D, E, and F are metal-based orbitals, with dominant f character.

**Supplementary Table 10.** Electronic wave function of the ground spin-orbit state, in terms of determinants for the Pa derivative. Only determinants contributing by more than 1% are shown. The spin component is neglected. Determinants are written down with respect to the occupation number of the different f orbitals shown in Supplementary Figure 31.

| orbitals/<br>weight | A | B | C | D | E | F | G | H | I |
|---------------------|---|---|---|---|---|---|---|---|---|
| 55%                 | 2 | 2 | 2 | 1 | 0 | 0 | 0 | 0 | 0 |
| 30%                 | 2 | 2 | 2 | 0 | 1 | 0 | 0 | 0 | 0 |
| 4%                  | 2 | 2 | 2 | 0 | 0 | 1 | 0 | 0 | 0 |

|       |                                                                                    |                                                                                     |                                                                                      |
|-------|------------------------------------------------------------------------------------|-------------------------------------------------------------------------------------|--------------------------------------------------------------------------------------|
|       | 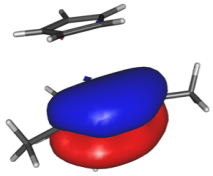  |   |   |
|       | A                                                                                  | B                                                                                   | C                                                                                    |
| comp. | 64% C(int)<br>25% C(ext)                                                           | 82% C(int)<br>7% C(ext)                                                             | 34% C(int)<br>50% C(ext)                                                             |
|       | 5% U(f)<br>3% U(d)                                                                 | 2% U(f)<br>6% U(d)                                                                  | 7% U(f)<br>3% U(d)                                                                   |
|       |   |   |   |
|       | D                                                                                  | E                                                                                   | F                                                                                    |
| comp. | 0% C(int)<br>0% C(ext)                                                             | 0% C(int)<br>0% C(ext)                                                              | 0% C(int)<br>1% C(ext)                                                               |
|       | 97% U(f)<br>1% U(d)                                                                | 99% U(f)<br>0% U(d)                                                                 | 96% U(f)<br>2% U(d)                                                                  |
|       |  |  |  |
|       | G                                                                                  | H                                                                                   | I                                                                                    |
| comp. | 35% C(int)<br>55% C(ext)                                                           | 83% C(int)<br>13% C(ext)                                                            | 65% C(int)<br>30% C(ext)                                                             |
|       | 2% U(f)<br>0% U(d)                                                                 | 1% U(f)<br>1% U(d)                                                                  | 1% U(f)<br>1% U(d)                                                                   |

**Supplementary Figure 32.** Active space MOs for the U derivative, with their composition in terms of atomic orbitals (isosurface = 0.03). C(int) corresponds to the internal carbon atoms, while C(ext) corresponds to the peripheral carbon atoms of the cumulene ligand. Orbitals A (G), B (H), and C(I) are the bonding (anti-bonding) orbitals built from the  $\pi$  bond in the cumulene ligand. Orbitals D, E, and F are metal-based orbitals, with dominant f character.

**Supplementary Table 11.** Electronic wave function of the ground spin-orbit state, in terms of determinants for the U derivative. Only determinants contributing by more than 1% are shown. The spin component is neglected. Determinants are written down with respect to the occupation number of the different f orbitals shown in Supplementary Figure 32.

| orbitals / weight | A | B | C | D | E | F | G | H | I |
|-------------------|---|---|---|---|---|---|---|---|---|
| 80%               | 2 | 2 | 2 | 1 | 1 | 0 | 0 | 0 | 0 |
| 9%                | 2 | 2 | 2 | 0 | 1 | 1 | 0 | 0 | 0 |

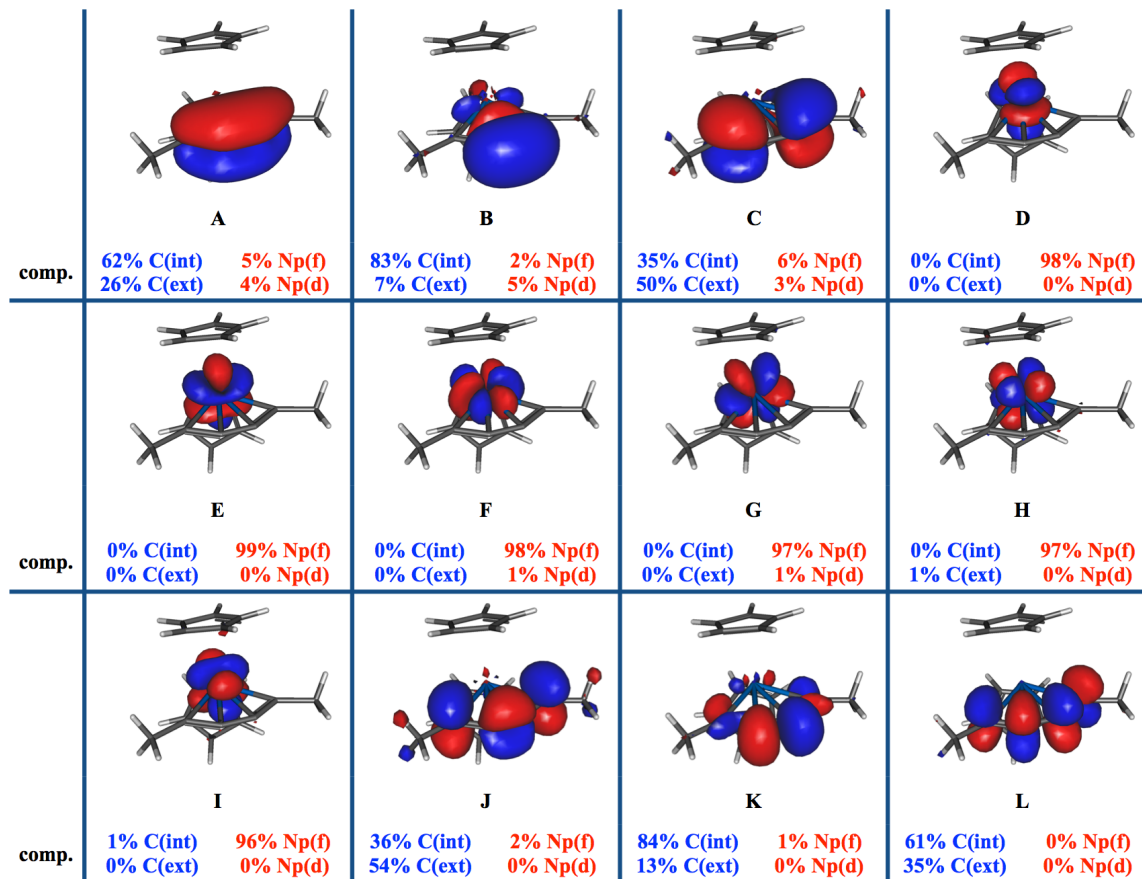

**Supplementary Figure 33.** Active space MOs for the Np derivative, with their composition in terms of atomic orbitals (isosurface = 0.03). C(int) corresponds to the internal carbon atoms, while C(ext) corresponds to the peripheral carbon atoms of the cumulene ligand. Orbitals A (J), B (K), and C(L) are the bonding (anti-bonding) orbitals built from the  $\pi$  bond in the cumulene ligand. Orbitals D-I are metal-based orbitals, with dominant f character.

**Supplementary Table 12.** Electronic wave function of the ground spin-orbit state, in terms of determinants for the Np derivative. Only determinants contributing by more than 1% are shown. The spin component is neglected. Determinants are written down with respect to the occupation number of the different f orbitals shown in Supplementary Figure 33.

| orbitals/<br>weight | A | B | C | D | E | F | G | H | I | J | K | L |
|---------------------|---|---|---|---|---|---|---|---|---|---|---|---|
| 38%                 | 2 | 2 | 2 | 1 | 1 | 1 | 0 | 0 | 0 | 0 | 0 | 0 |
| 25%                 | 2 | 2 | 2 | 1 | 0 | 1 | 1 | 0 | 0 | 0 | 0 | 0 |
| 6%                  | 2 | 2 | 2 | 0 | 1 | 1 | 0 | 1 | 0 | 0 | 0 | 0 |
| 6%                  | 2 | 2 | 2 | 0 | 1 | 1 | 0 | 0 | 1 | 0 | 0 | 0 |
| 4%                  | 2 | 2 | 2 | 0 | 0 | 1 | 1 | 0 | 1 | 0 | 0 | 0 |
| 2%                  | 2 | 2 | 2 | 1 | 1 | 0 | 0 | 1 | 0 | 0 | 0 | 0 |
| 2%                  | 2 | 2 | 2 | 1 | 0 | 0 | 1 | 1 | 0 | 0 | 0 | 0 |



|       |                                                                                   |                                                                                   |                                                                                   |                                                                                     |                                                                                     |
|-------|-----------------------------------------------------------------------------------|-----------------------------------------------------------------------------------|-----------------------------------------------------------------------------------|-------------------------------------------------------------------------------------|-------------------------------------------------------------------------------------|
|       | 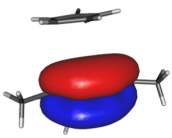 |  |  |  |                                                                                     |
| comp. | 62% C(int) 4% Pu(f)<br>27% C(ext) 3% Pu(d)                                        | 84% C(int) 2% Pu(f)<br>7% C(ext) 4% Pu(d)                                         | 36% C(int) 6% Pu(f)<br>50% C(ext) 2% Pu(d)                                        | 0% C(int) 98% Pu(f)<br>0% C(ext) 1% Pu(d)                                           |                                                                                     |
|       |  |  |  |  |                                                                                     |
| comp. | 0% C(int) 99% Pu(f)<br>0% C(ext) 0% Pu(d)                                         | 0% C(int) 99% Pu(f)<br>0% C(ext) 0% Pu(d)                                         | 0% C(int) 97% Pu(f)<br>0% C(ext) 1% Pu(d)                                         | 0% C(int) 98% Pu(f)<br>1% C(ext) 0% Pu(d)                                           |                                                                                     |
|       |  |  |  |  |  |
| comp. | 1% C(int) 97% Pu(f)<br>0% C(ext) 0% Pu(d)                                         | 1% C(int) 93% Pu(f)<br>1% C(ext) 3% Pu(d)                                         | 36% C(int) 2% Pu(f)<br>54% C(ext) 0% Pu(d)                                        | 84% C(int) 1% Pu(f)<br>14% C(ext) 0% Pu(d)                                          | 60% C(int) 0% Pu(f)<br>36% C(ext) 0% Pu(d)                                          |

**Supplementary Figure 34.** Active space MOs for the Pu derivative, with their composition in terms of atomic orbitals (isosurface = 0.03). C(int) corresponds to the internal carbon atoms, while C(ext) corresponds to the peripheral carbon atoms of the cumulene ligand. Orbitals A (K), B (L), and C(M) are the bonding (anti-bonding) orbitals built from the  $\pi$  bond in the cumulene ligand. Orbitals D-J are metal-based orbitals, with dominant f character.

**Supplementary Table 13.** Electronic wave function of the ground spin-orbit state, in terms of determinants for the Pu derivative. Only determinants contributing by more than 1% are shown. The spin component is neglected. Determinants are written down with respect to the occupation number of the different f orbitals shown in Supplementary Figure 34.

| orbitals/<br>weight | A | B | C | D | E | F | G | H | I | J | K | L | M |
|---------------------|---|---|---|---|---|---|---|---|---|---|---|---|---|
| 40%                 | 2 | 2 | 2 | 1 | 1 | 1 | 0 | 1 | 0 | 0 | 0 | 0 | 0 |
| 29%                 | 2 | 2 | 2 | 1 | 1 | 1 | 1 | 0 | 0 | 0 | 0 | 0 | 0 |
| 6%                  | 2 | 2 | 2 | 0 | 1 | 1 | 0 | 1 | 1 | 0 | 0 | 0 | 0 |
| 3%                  | 2 | 2 | 2 | 0 | 1 | 1 | 1 | 0 | 1 | 0 | 0 | 0 | 0 |
| 3%                  | 2 | 2 | 2 | 1 | 0 | 0 | 1 | 1 | 0 | 1 | 0 | 0 | 0 |
| 2%                  | 2 | 2 | 2 | 1 | 0 | 1 | 0 | 1 | 1 | 0 | 0 | 0 | 0 |
| 2%                  | 2 | 2 | 2 | 1 | 0 | 1 | 1 | 0 | 1 | 0 | 0 | 0 | 0 |
| 2%                  | 2 | 2 | 2 | 1 | 0 | 1 | 0 | 1 | 0 | 1 | 0 | 0 | 0 |
| 1%                  | 2 | 2 | 2 | 0 | 0 | 1 | 1 | 0 | 1 | 1 | 0 | 0 | 0 |

For all systems, the electronic wave function of the ground state has a strong multi-reference character, which stems from distributing the unpaired electrons among the orbitals with dominant f-character, but does not involve the ligand orbitals. Indeed, the occupation number of the ligand-based orbitals in any determinant that makes a contribution larger than 1% is always either 2 or 0, which means that these orbitals do not contribute to the multi-reference character of the wave function.

In addition, from the detailed composition of the active space orbitals, it appears that orbitals with dominant f-character are mostly non-bonding as they always hold close to 99% f character. The only noticeable exception is the Pa derivative for which bonding-type metal-ligand mixing (96% vs. 3%) is observed, as shown on Supplementary Figure 35-a. The f orbital that is involved in this mixing has the same symmetry as the one evidenced from DFT calculations and AdNDP analysis to achieve  $\phi$  back-donation.

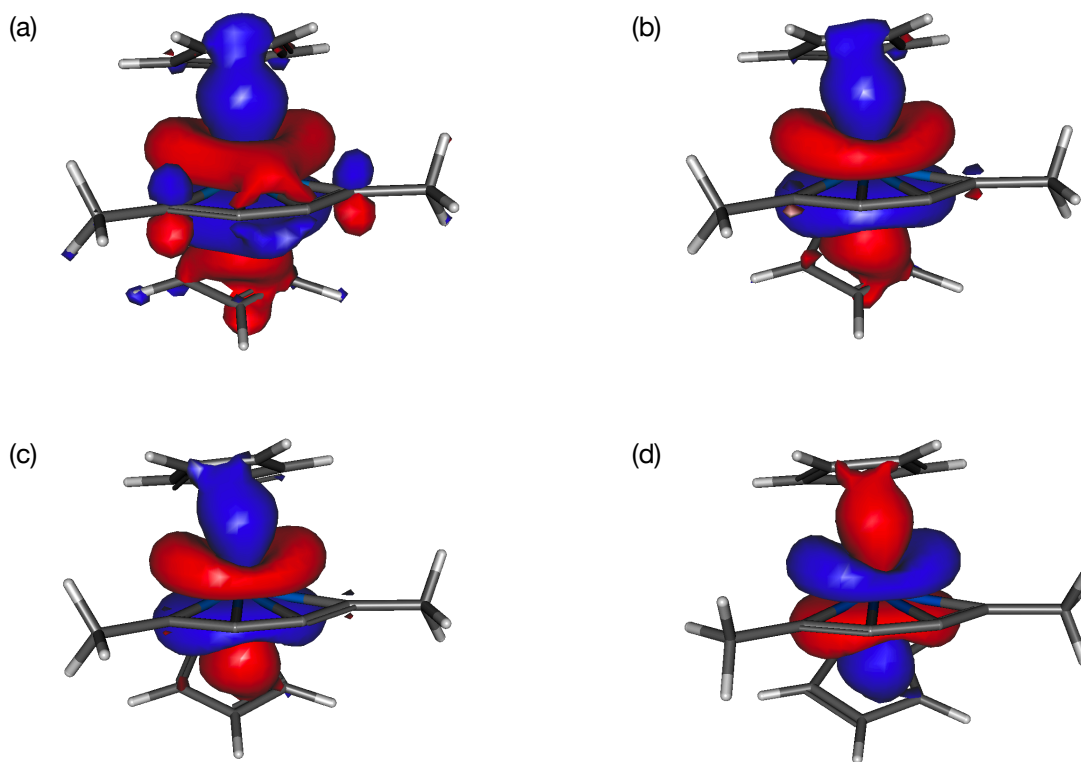

**Supplementary Figure 35.** Orbital F of the Pa derivative (a), and orbital E of the U, Np and Pu derivatives (b-d) with isosurface = 0.01.

Since (1) the metal-based orbitals of the active space are mostly non-bonding, and (2) the multi-reference character of the ground state wave function stems from distributing the unpaired electrons among these non-bonding orbitals, it is expected that the multi-reference character of the wave function will not modify the bonding picture obtained from the AdNDP analysis based on single-reference DFT calculations for the investigated systems.

## Supplementary References

- (1) Zhang, L.; Fang, B.; Hou, G.; Zi, G.; Ding, W.; Walter, M. D. *Organometallics* 2017, *36*, 898–910.
- (2) Pagano, J. K.; Erickson, K. A.; Scott, B. L.; Morris, D. E.; Waterman, R.; Kiplinger, J. L. *J. Organomet. Chem.* 2017, *829*, 79–84.
- (3) Pellny, P. M.; Kirchbauer, F. G.; Burlakov, V. V.; Baumann, W.; Spannenberg, A.; Rosenthal, U. *J. Am. Chem. Soc.* 1999, *121*, 8313–8323.
- (4) Fang, B.; Zhang, L.; Hou, G.; Zi, G.; Fang, D. C.; Walter, M. D. *Organometallics* 2015, *34*, 5669–5681.
- (5) Burlakov, V. V.; Polyakov, A. V.; Yanovsky, A. I.; Struchkov, Y. T.; Shur, V. B.; Vol'pin, M. E.; Rosenthal, U.; Görls, H. *J. Organomet. Chem.* 1994, *476*, 197–206.
- (6) Fang, B.; Ren, W.; Hou, G.; Zi, G.; Fang, D. C.; Maron, L.; Walter, M. D. *J. Am. Chem. Soc.* 2014, *136*, 17249–17261.
- (7) Zhang, L.; Hou, G.; Zi, G.; Ding, W.; Walter, M. D. *J. Am. Chem. Soc.* 2016, *138*, 5130–5142.
- (8) Arndt, P.; Burlakov, V. V.; Spannenberg, A.; Rosenthal, U. *Inorg. Chem. Commun.* 2007, *10*, 792–794.
